# Supplementary material for: Knowledge and perspectives of the new National Cervical Screening Program: a qualitative interview study of North Queensland women—‘I could be that one percent’
Source: PubMed Central journal article supplement — BMJ Open. 2020 Mar 9;10(3):e034483. doi: 10.1136/bmjopen-2019-034483 (PMC7064076; doi:10.1136/bmjopen-2019-034483), 2020-03-09
Supplement: bmjopen-2019-034483.draft_revisions.pdf [file bmjopen-2019-034483.draft_revisions.pdf]

# BMJ Open

BMJ Open is committed to open peer review. As part of this commitment we make the peer review history of every article we publish publicly available.

When an article is published we post the peer reviewers' comments and the authors' responses online. We also post the versions of the paper that were used during peer review. These are the versions that the peer review comments apply to.

The versions of the paper that follow are the versions that were submitted during the peer review process. They are not the versions of record or the final published versions. They should not be cited or distributed as the published version of this manuscript.

BMJ Open is an open access journal and the full, final, typeset and author-corrected version of record of the manuscript is available on our site with no access controls, subscription charges or pay-per-view fees (<http://bmjopen.bmj.com>).

If you have any questions on BMJ Open's open peer review process please email [info.bmjopen@bmj.com](mailto:info.bmjopen@bmj.com)

# BMJ Open

## **“I could be that one percent”: A qualitative study of North Queensland women’s knowledge and perspectives on the new National Cervical Screening Program**

|                               |                                                                                                                                                                                                                                                      |
|-------------------------------|------------------------------------------------------------------------------------------------------------------------------------------------------------------------------------------------------------------------------------------------------|
| Journal:                      | <i>BMJ Open</i>                                                                                                                                                                                                                                      |
| Manuscript ID                 | bmjopen-2019-034483                                                                                                                                                                                                                                  |
| Article Type:                 | Original research                                                                                                                                                                                                                                    |
| Date Submitted by the Author: | 24-Sep-2019                                                                                                                                                                                                                                          |
| Complete List of Authors:     | Nagendiram, Archana; James Cook University Mackay Education and Research Centre, Bidgood, Rachel<br>Heal, Clare; James Cook University, School of Medicine and Dentistry<br>Banks, Jennifer; James Cook University, School of Medicine and Dentistry |
| Keywords:                     | Community gynaecology < GYNAECOLOGY, Public health < INFECTIOUS DISEASES, Gynaecological oncology < ONCOLOGY, PREVENTIVE MEDICINE                                                                                                                    |
|                               |                                                                                                                                                                                                                                                      |

SCHOLARONE™  
Manuscripts

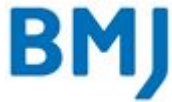

I, the Submitting Author has the right to grant and does grant on behalf of all authors of the Work (as defined in the below author licence), an exclusive licence and/or a non-exclusive licence for contributions from authors who are: i) UK Crown employees; ii) where BMJ has agreed a CC-BY licence shall apply, and/or iii) in accordance with the terms applicable for US Federal Government officers or employees acting as part of their official duties; on a worldwide, perpetual, irrevocable, royalty-free basis to BMJ Publishing Group Ltd ("BMJ") its licensees and where the relevant Journal is co-owned by BMJ to the co-owners of the Journal, to publish the Work in this journal and any other BMJ products and to exploit all rights, as set out in our [licence](#).

The Submitting Author accepts and understands that any supply made under these terms is made by BMJ to the Submitting Author unless you are acting as an employee on behalf of your employer or a postgraduate student of an affiliated institution which is paying any applicable article publishing charge ("APC") for Open Access articles. Where the Submitting Author wishes to make the Work available on an Open Access basis (and intends to pay the relevant APC), the terms of reuse of such Open Access shall be governed by a Creative Commons licence – details of these licences and which [Creative Commons](#) licence will apply to this Work are set out in our licence referred to above.

Other than as permitted in any relevant BMJ Author's Self Archiving Policies, I confirm this Work has not been accepted for publication elsewhere, is not being considered for publication elsewhere and does not duplicate material already published. I confirm all authors consent to publication of this Work and authorise the granting of this licence.

1  
2  
3  
4  
5  
6  
7  
8  
9  
10  
11  
12  
13  
14  
15  
16  
17  
18  
19  
20  
21  
22  
23  
24  
25  
26  
27  
28  
29  
30  
31  
32  
33  
34  
35  
36  
37  
38  
39  
40  
41  
42  
43  
44  
45  
46  
47  
48  
49  
50  
51  
52  
53  
54  
55  
56  
57  
58  
59  
60

# “I could be that one percent”: A qualitative study of North Queensland women’s knowledge and perspectives on the new National Cervical Screening

## Program

Archana Nagendiram<sup>1</sup>  
archana.nagendiram@my.jcu.edu.au

Dr Rachel Bidgood<sup>2</sup>  
dr.bidgood@onestopmedical.com.au

Dr Jennifer Banks<sup>1</sup>  
Jennifer.banks2@jcu.edu.au

Professor Clare Heal<sup>1</sup>  
clare.heal@jcu.edu.au

<sup>1</sup> Mackay Clinical School  
College of Medicine and Dentistry  
James Cook University  
Level 1, Building K  
Mackay Base Hospital  
Mackay, QLD  
Australia 4740  
Phone: 07 4885 7142  
Fax: 07 4885 7111

<sup>2</sup> Canelands Medical Centre  
Shop 2126  
2 Mangrove Rd  
Mackay, QLD  
Australia 4740  
Phone: 07 49511411  
Fax: 07 4953 4272

1  
2  
3 Key words: Cervix Uteri, mass screening, Australia, Early detection of cancer, attitude  
4  
5  
6

7 Word count 3669 words  
8  
9  
10  
11  
12  
13  
14

## 15 Abstract

### 16 *Objectives*

17  
18 To investigate women's understanding and attitudes towards the National Cervical Screening  
19 Program (NCSP) and to explore methods to improve screening participation.  
20  
21  
22

### 23 *Design*

24  
25 Semi-structured face to face interviews were conducted through convenience and snowball  
26 sampling. Thematic analysis occurred using the interpretivist framework.  
27  
28  
29

### 30 *Setting*

31  
32 A private general practice in North Queensland.  
33  
34

### 35 *Participants*

36  
37 Fourteen women between 18-74 years who attended the general practice.  
38  
39

### 40 *Results*

41  
42 Participants were concerned that the new NCSP would miss cancer due to longer screening intervals  
43 and reliance on primary HPV testing. They believed that young women are at increased risk of  
44 cervical cancer, due to perceived HPV vaccine ineffectiveness and parent objection to vaccination.  
45 Most participants were not agreeable to self-sampling and preferred their doctor to perform  
46 screening. Personal and practitioner beliefs influenced a woman's screening participation. Personal  
47 factors include being healthy for themselves and their family, previous abnormal smears and family  
48 history of cancer. Emphasis was placed on feeling 'comfortable' with their practitioner which  
49 included patient rapport and gender preference. Proposed methods to improve cervical screening  
50 included education programs, advertising campaigns, general practitioner interventions and  
51 improving accessibility.  
52  
53  
54  
55  
56  
57  
58

### 59 *Conclusions*

60

1  
2  
3 Women are hesitant about the new NCSP however when provided with additional information they  
4 were more amenable to the changes. This highlights the need to improve awareness of cervical  
5 screening and the new NCSP.  
6  
7  
8  
9

## 10 Article Summary

### 13 Strengths and limitations of this study

- 15 • Interviews explored participants' attitudes towards the new NCSP, where there is currently  
16 little research.
- 17 • Individual interviews were conducted until theoretical data saturation and the interview  
18 template was piloted.
- 19 • Convenience and snowball sampling through a private general practice may have led to  
20 inaccurate sample representation.
- 21 • Most participants were well-screened for cervical cancer, which may not be inclusive of high  
22 risk groups.
- 23 • The study was completed in an outer regional centre and may not apply to the general  
24 Australian population.

## 33 Background

36 While the National Cervical Screening program (NCSP) has more than halved cervical cancer  
37 mortality, only 54-56% of eligible Australian women<sup>1</sup> participated in screening between January  
38 2016-June 2017. This is especially concerning as over 90% of women diagnosed with cervical cancer  
39 were under-screened or never-screened. Women from lower socioeconomic status, rural areas or  
40 those that identify as Aboriginal and Torres Strait Islander have lower screening participation rates  
41 and higher cervical cancer mortality.<sup>1</sup> Recently the NCSP has moved away from traditional pap  
42 smears screening for abnormal cells, towards a 5 yearly cervical screening test (CST) for the Human  
43 Papilloma Virus (HPV) and reflex cytology. Australian women begin cervical screening at 25 years old  
44 and have an exit CST from 70-74 years old. Women over 30 years who are considered never or  
45 under-screened are also eligible for self-sampling, consisting of a high vaginal swab for HPV.<sup>2,3</sup>

46  
47  
48  
49  
50  
51  
52  
53  
54 Due to the recent nature of changes to cervical screening, there is limited qualitative literature  
55 assessing Australian women's attitudes towards the new NCSP. Thematic analysis of an online  
56 petition against the new NCSP revealed that the greatest concerns were missing cancer due to  
57 prolonged screening intervals and the delay in screening age.<sup>4</sup> Previous international studies stated  
58  
59  
60

1  
2  
3 that some women may experience a negative emotional response towards primary HPV testing as it  
4 is a sexually transmitted infection.<sup>5,6</sup>  
5  
6

7 The researchers' primary aim was to explore North Queensland women's awareness and  
8 perceptions of the new NCSP. Knowledge of cervical cancer, factors that affect screening  
9 participation and methods to improve screening awareness were also investigated.  
10  
11  
12

## 13 Methods

14  
15  
16 Authors followed the Consolidated Criteria for Reporting Qualitative Health Research (COREQ).  
17  
18

### 19 Patient selection and setting

20  
21 Women between 18-74 years old who attended a specific North Queensland general practice were  
22 eligible for this study with convenience and snowball sampling. This project was conducted with a  
23 concurrent quantitative survey. Receptionists provided waiting room surveys and an expression of  
24 interest form for a follow-up interview. Quantitative results will be published separately. The  
25 interviews were advertised on the practice's Facebook page and participants were encouraged to  
26 promote the study to their family and friends. Women who expressed interest were contacted by  
27 phone or email.  
28  
29  
30  
31  
32

### 33 Data collection

34  
35 A semi-structured, face-to-face individual interview was conducted at the participant's convenience  
36 at their home or a hospital meeting room between March and April 2019. The average length of the  
37 interview was 20 minutes. All interviews were conducted by the primary author, a female medical  
38 student (AN) with training in qualitative research. The interviewer (AN) may have some personal bias  
39 as she is eligible for cervical screening. No participants were known to AN and participants were  
40 aware that this interview was part of an Honours project.  
41  
42  
43  
44  
45  
46

47 The piloted interview guide included questions about knowledge of cervical cancer and screening,  
48 opinions regarding the NCSP, barriers to screening and thoughts to improve screening participation.  
49 During the interview, participants were asked their opinions of the new NCSP, both with their  
50 baseline knowledge and after the interviewer provided basic information on the program. The  
51 interview guide was developed after analysis of the existing literature<sup>7,8</sup> and discussion amongst the  
52 investigators, including a general practitioner and a research officer, both experienced in qualitative  
53 research. Prior to the interview, participants signed a consent form for the interview to be audio  
54 recorded. The interviews were transcribed verbatim, including notes on non-verbal cues and were  
55  
56  
57  
58  
59  
60

1  
2  
3 uploaded to nVivo. Transcribed interviews were not returned to participants for comments and no  
4 repeat interviews were conducted. Data collection continued until theoretical data saturation was  
5 achieved.  
6  
7

### 8 9 **Patient and public involvement**

10  
11 No participants were involved with the development of this study protocol or data analysis.  
12

### 13 **Data analysis**

14  
15 Transcribed interviews were analysed using NVivo 12 Plus<sup>9</sup> using thematic analysis and the  
16 interpretivist paradigm. Data was analysed under relevant headings, for example 'Attitudes towards  
17 NCSP' and 'Factors affecting screening participation' but no themes were predetermined. AN  
18 completed line-by-line coding to identify the preliminary themes and codes in the data, which was  
19 reviewed by another author (JB). Data was further analysed to cluster themes under the appropriate  
20 research questions to create a thematic schema.  
21  
22  
23  
24  
25

### 26 **Ethical Considerations**

27  
28 Ethical approval was provided by the James Cook University Human Research Ethics Committee  
29 (H7465). Participants completed a consent form that stated that they agreed to a recorded  
30 interview.  
31  
32  
33  
34

## 35 **Results**

### 36 **Participant Characteristics**

37  
38 Twenty-eight women expressed interest to be interviewed and were contacted by phone or email.  
39 Fourteen women consented to be interviewed. Table 1 displays individual participant characteristics.  
40 The age of participants ranged between 20 and 58 years old. Most women participated in screening  
41 and only two were considered under-screened as per the previous NCSP.  
42  
43  
44  
45  
46  
47

### 48 **Themes**

49  
50 Thematic analysis revealed three major themes on participant's attitudes towards the NCSP: 'Fear of  
51 missing cancer', 'younger women are at greater risk' and 'change is good'. Screening beliefs were  
52 subdivided into personal and practitioner factors. Based on participants' suggestions, four potential  
53 intervention strategies emerged. Table 2 displays illustrative quotes for these themes. A thematic  
54 schema depicting conceptual links throughout the themes is displayed in Figure 1.  
55  
56  
57  
58  
59

### 60 **Knowledge of Cervical Cancer and NCSP**



1  
2  
3 Participants identified genetics and infection as the main causes of cervical cancer. Most participants  
4 did not specify HPV as the main cause of cervical cancer but when asked, participants were  
5 frequently aware of the link between HPV and cervical cancer. Hormones, contraceptive pill,  
6  
7 smoking and toxins were listed by participants as causes of cervical cancer. Women considered  
8  
9 family history and sexual activity the main risk factors for cervical cancer. Other risk factors included  
10  
11 not participating in regular screening, previous abnormal smears and being unvaccinated.

12  
13 Participants believed abnormal bleeding and pain were symptoms of cervical screening though,  
14  
15 many women were unsure of the symptoms. Bloating, abnormal discharge and pain during sex  
16  
17 (dyspareunia) were also reported by some participants as symptoms of cervical cancer.

18  
19 Participants understood that cervical screening occurs using pap smears and often could describe  
20  
21 that pap smears look for abnormal cells. Some participants were aware of the change to screening  
22  
23 and could correctly identify that screening was now 5-yearly. Women stated that cervical screening  
24  
25 should occur in their early twenties and some said that it began with the onset of sexual activity.

## 26 27 28 **Attitudes towards the new NCSP**

### 29 30 **FEAR OF MISSING CANCER**

31  
32  
33 Participants were anxious that 5 years was 'a long time for cancer to grow' (P12) and may lead to  
34  
35 more women diagnosed with cancer. More regular screening was identified as having 'a better  
36  
37 chance of picking something up' (P14) as 'things in our body change very quickly' (P1). There were  
38  
39 fears that increased screening intervals may miss cancer, as clinicians may not always get a 'clear  
40  
41 swab' (P8) and hence more regular screening was preferable. Additionally, participants were  
42  
43 apprehensive that primary HPV testing would miss cancer caused by 'things other than HPV' (P9).  
44  
45 They were uncomfortable with the CST not testing for abnormal cells as 'I could be that one percent'  
46  
47 (P12) with cervical cancer not caused by HPV. Subsequently, some participants preferred co-testing  
48  
49 for both HPV and abnormal cells to receive the benefits of both screening methods.

50  
51 Women believed that 'every 2 years is easy enough to recall but not 5 years' (P12) and may not  
52  
53 remember to participate in screening, due to increased screening intervals. Participants were  
54  
55 concerned that increased screening intervals will make women more 'complacent' (P12) in their  
56  
57 screening behaviour and will delay screening even longer. They proposed that increased intervals  
58  
59 required a register to provide appropriate reminders to women. A participant stated that increased  
60  
intervals may also affect the feasibility of contacting patients, as after five years 'not everyone lives  
at the same address' (P7).

1  
2  
3 Those with a history of previous abnormal smears thought 5 yearly screening was 'a little bit  
4 concerning' (P8). Participants who had family or friends with cervical cancer were concerned by the  
5 increased screening interval as 'they didn't pick up hers until it was too late' (P4). One participant  
6 negatively viewed delaying screening until a woman is 25 years, as her friend was diagnosed with  
7 cervical cancer earlier than this, and 'if they didn't catch it early, she'd be dead' (P2). These personal  
8 experiences with abnormal smears or cervical cancer made women more 'paranoid' (P4) about  
9 cervical cancer.  
10  
11  
12  
13  
14

#### 15 YOUNG WOMEN ARE AT GREATER RISK

16  
17  
18 Participants perceived that commencing screening from 25 years old, placed women at increased  
19 risk for cancer due to earlier sexual activity of young women. Participants stated that children are  
20 'having sex a lot younger nowadays' (P13). They highlighted that as young women are sexually active  
21 from their early teens, it may be 'over 10 years that kids are sexually active before they have  
22 screening' (P3). Participants also believed that delaying cervical screening would prevent  
23 opportunistic testing for sexually transmitted infections in young women.  
24  
25  
26  
27

28  
29 While some women identified that the introduction of the Gardasil vaccination was beneficial in  
30 reducing cervical cancer incidence, there was also a perception that 'a lot of parents won't let their  
31 kids have that' (P5). This raised concerns as to whether unvaccinated women would be protected  
32 under the new NCSP in the future. Additionally, participants feared that 'even though you are  
33 vaccinated you can still get diseases' (P7) and believed that delaying screening will lead to cervical  
34 cancer being missed in women under 25 years. Some participants thought that patients diagnosed  
35 with cancer are becoming 'younger and younger' (P2). Younger women were described to be at  
36 'higher risk' (P2) of cervical cancer and participants felt that earlier detection of cervical cancer in  
37 women would improve their survival rates.  
38  
39  
40  
41  
42  
43

#### 44 CHANGE IS GOOD

45  
46  
47 Several participants expressed their 'faith in the doctors' (P11) and believed that screening would  
48 not have changed without underlying improvements in science. They perceived that 'testing is that  
49 good' (P7) if screening intervals have increased from every 2 years to 5 years. Participants  
50 highlighted that HPV testing is a positive change as it would 'catch it (HPV)' (P11) before abnormal  
51 cells became detectable by a traditional pap smear. They accepted that if HPV was 'linked so  
52 strongly' (P9) with cervical cancer, primary HPV testing was a beneficial change to cervical screening.  
53 After participants were provided information on the new NCSP and cervical cancer's slow  
54 progression, they were more receptive towards the new guidelines. An additional benefit of the new  
55  
56  
57  
58  
59  
60

1  
2  
3 NCSF was that reduced screening would 'make life easier' (P6) for women, as cervical screening was  
4 described as 'uncomfortable' (P14) by participants.  
5

#### 6 7 SELF-SAMPLING 8

9  
10 Participants were generally hesitant to accept self-sampling as they did not 'feel confident enough in  
11 myself' (P14) to administer the test. This stemmed from the fear of incorrectly completing the test  
12 as they may not 'swab far enough' (P5) or that 'it might be contaminated' (P4). Doctors were  
13 thought to be better equipped to perform cervical screening as they had appropriate training to  
14 ensure it was 'done properly' (P8). It was perceived that doctors had better visualisation of the  
15 cervix as they used a speculum and would take a sample from 'the right places' (P3).  
16  
17

18  
19  
20 Nonetheless, participants acknowledged that self-sampling would provide women 'more privacy'  
21 (P10) and could improve screening participation. The test was deemed to be 'less invasive' (P5) than  
22 traditional cervical screening, especially for those who have had previous negative experiences with  
23 cervical screening. Participants often had the misconception that self-sampling required a cervical  
24 swab. When informed it was in fact, a high-vaginal swab more participants reported they would  
25 consider self-sampling. Some participants indicated that they would complete self-sampling if they  
26 were provided instructions or shown by a practitioner. Women highlighted that technological  
27 improvements allowed for 'smaller traces' (P2) of HPV to be detected and this made self-sampling  
28 more acceptable.  
29  
30  
31  
32  
33  
34  
35  
36  
37  
38

#### 39 **Factors affecting screening participation**

##### 40 PERSONAL

41  
42  
43 Participants explained that cervical screening was a part of their normal health 'routine' (P11).  
44 Screening allowed them to have 'peace of mind' that they were healthy, and it allowed them to  
45 receive 'further help' (P1) if required. Many women emphasised that their family was the key reason  
46 they had cervical screening. They described their sense of responsibility to their family who required  
47 them to 'make the right choices' (P3) by undergoing screening. Participants disclosed that cancer  
48 could destroy their families and thus they chose to screen. A woman's personal experiences with  
49 cancer shaped her willingness to participate in cervical screening. A history of abnormal smears  
50 motivated women to 'keep on top' (P13) of their screening to prevent re-occurrence. Women with a  
51 family history of cancer had firsthand experience as to how it devastated their families, which  
52 motivated them to undergo regular cervical screening.  
53  
54  
55  
56  
57  
58  
59  
60

## PRACTITIONER

Several participants described feeling 'comfortable' (P10) with their general practitioner as a facilitator to screening participation. This feeling of being 'comfortable' was influenced by the doctor's bedside manner, professional behaviour and hygienic technique throughout the procedure. Some women expressed that they trusted their regular doctor due to their pre-existing relationship, as they have known them for a 'long time' (P4). Participants frequently mentioned their practitioner's gender when discussing screening participation. Most participants indicated that they are more 'comfortable' with a female doctor as she 'has the same bits' (P2). However, some women had no gender preference as cervical screening is 'just something that happens' (P7) and one participant thought that 'once you have a few kids, you're over it' (P4).

### **Improving CST Awareness and Participation**

#### *Cost and Accessibility*

A lack of bulk-billed services in regional areas was identified by women as a key barrier to cervical screening participation. The cost of cervical screening was a 'deterrent' (P5) for attending the general practitioner for screening, especially in low socioeconomic women as 'their priority is probably not money for them, it's going to be feeding their children' (P5). Participants also emphasised that cervical screening is not bulk-billed, unlike breast and bowel cancer. Women expressed the need for increased accessibility of cervical screening, especially in regional communities. It was suggested that cervical screening should have 'pop-up' (P9) clinics, as seen with blood donation and breast screening.

#### *Media Campaigns*

The role of a media campaign to potentially increase cervical screening awareness was discussed by participants. Participants proposed that television advertisements should be aired to encourage discussion about screening. Social media was deemed to be a valuable platform to educate about cervical screening due to its 'really big role in young women's lives' (P9) and the interaction remained 'private' (P2). Women also suggested that an ambassador should lead the discussion on cervical cancer, such as in England when a celebrity 'found out on Big Brother that she had cervical cancer' (P3). Participants expressed that it is important to hear personal stories from survivors as it provides a 'scare factor' (P8) and would encourage screening.

#### *Education Programs*

1  
2  
3 Participants explained the importance of education to improve screening participation, especially in  
4 schools through sex education to ensure young women have the 'right information' (P5) about HPV  
5 and cervical cancer. Education programs should inform women about the purpose of the Gardasil  
6 vaccine, the NCSP and symptoms of cervical cancer. Participants believed that education will reduce  
7 any fears related to screening and solidify 'how important it is' (P12). It was also suggested that  
8 education sessions should also occur at universities, playgroups and the workplace.  
9

### 14 *General Practitioner*

16 Participants emphasised the importance of their general practitioner as a trusted source of  
17 information about cervical screening as 'you listen to them' (P6). It was indicated that general  
18 practitioners should facilitate opportunistic discussions about screening, especially when a woman  
19 turned 25 years old. Practices should display information in the waiting rooms and provide written  
20 information such as pamphlets or fact sheets, with this information being 'very direct, black and  
21 white' (P1) to increase the likelihood that a woman will read it. It was also proposed that general  
22 practices should provide information by phone or email.  
23  
24  
25  
26  
27  
28

## 30 Discussion

32 It became apparent that women were hesitant about the new NCSP, as they were apprehensive that  
33 screening will miss cancers due to primary HPV testing and increased screening intervals. A  
34 qualitative Irish study highlighted that even when women understood HPV causes cancer, they were  
35 anxious about screening changes due to their attachment to traditional pap smears.<sup>10</sup> Participants  
36 were afraid that the new program would endanger young women as they were perceived to be at  
37 increased risk of cervical cancer. Young women are becoming sexually active earlier and participants  
38 were also concerned about the effectiveness of vaccination. In reality however, women over 50  
39 years are at higher risk for cervical cancer and this misconception of age related risk may indicate  
40 the need for more patient education.<sup>11</sup> Moreover, the new screening program is predicted to have a  
41 greater impact in cervical cancer mortality in unvaccinated cohorts (36%) over vaccinated cohorts  
42 (29%).<sup>12</sup> It appears that participants are wary of the change to screening, though some women  
43 became more accepting of the new program when provided information and this reiterates the need  
44 for improved health literacy on cervical cancer.  
45  
46  
47  
48  
49  
50  
51  
52  
53

55 Participants suggested a variety of methods to improve screening, including education programs  
56 concentrating on young women. Minimal education about cervical cancer and HPV occurs in schools  
57 and parents perceived it is not their responsibility to educate their children on this topic. Although,  
58 school-based education programs were an acceptable solution to this.<sup>13</sup> Media and social media  
59  
60

1  
2  
3 campaigns were proposed to increase awareness, with previous research suggesting an emphasis on  
4 factual information from organisations over personal anecdotes.<sup>14</sup> The general practitioner is a  
5 trusted and valued source of information and should provide interventional health education with  
6 eligible women.<sup>15,16</sup> More research should occur in general practice to develop and evaluate  
7 interventions in order to improve cervical screening. Finally, financial concerns prevented women  
8 from participating in screening. Women incur a cost with cervical screening unlike bowel or breast  
9 screening. Government policymakers should reassess the costs involved in cervical screening and  
10 consider expanding the availability of bulk-billed services.

11  
12 Screening participation is influenced by personal and practitioner factors. A woman's personal  
13 factors include: to be healthy, to be there for family, history of abnormal smears or cancer. A  
14 woman's comfort in her relationship with her practitioner influenced her screening behaviour. This  
15 was determined by trust in her regular doctor, gender preference and a general feeling of comfort. A  
16 previous qualitative literature review similarly discussed that screening provides reassurance of  
17 health. Though unlike this study, it also iterated that the test was uncomfortable, embarrassing and  
18 previous negative experiences hindered participation.<sup>17</sup> This may be as the literature review  
19 encompassed studies that included under-screened populations, while this study only included two  
20 under-screened women.

21  
22 This study provides timely qualitative research on participant's perceptions of the new NCSP and will  
23 provide valuable data on these changes. Researchers conducted interviews using a piloted interview  
24 template until theoretical data saturation. It was also conducted in parallel to a quantitative study as  
25 an explanatory component and allowed for data triangulation. The use of convenience and snowball  
26 sampling at one private regional general practice may have led to a skewed representation of the  
27 population and may not include high risk groups for cervical cancer.

## 28 29 30 31 32 33 34 35 36 37 38 39 40 41 42 43 44 45 46 47 48 49 50 51 52 53 54 55 56 57 58 59 60

## Conclusion

Women are apprehensive about the new changes to the NCSP, as they believe that increased  
screening intervals and primary HPV testing may lead to missed cervical cancers. Personal and  
practitioner factors affect screening participation, with emphasis on maintaining good health and  
feeling 'comfortable' with their doctor. Cervical cancer participation could be improved by increasing  
education about cervical cancer and the new NCSP through schools, advertising campaigns and the  
general practitioner. It was also emphasised that the cost and accessibility of screening should be  
revised.

## Acknowledgements

The authors would like to thank the staff of the general practice where this study was conducted for their assistance with participant recruitment. We also would like to acknowledge the women who participated in interviews for their time and opinions.

## Author Statement

AN designed the study, conducted interviews, transcribed interviews, coded data, conducted thematic analysis and was primary author of the manuscript. RB assisted with logistical considerations for data collection at the general practice. JB assisted with study design, designing the interview template, reviewed thematic analysis and provided intellectual input into the manuscripts. CH assisted with study design, creating the interview template and provided intellectual input into the manuscripts.

## Conflicts of Interests

None declared

## Data Statement

Technical appendix, statistical code, and dataset available from the Dryad repository, doi:10.5061/dryad.7m0cfxppx

## Funding

This work was supported by the College of Medicine and Dentistry, James Cook University (grant number JCU-QLD-792241)

## Bibliography

1. AIHW. Cervical screening in Australia 2019. AIHW website. <https://www.aihw.gov.au/reports/cancer-screening/cervical-screening-in-australia-2019/contents/table-of-contents>. Published May 6 2019. Accessed September 12 2019.
2. MSAC. National Cervical Screening Program Renewal: Executive Summary. Department of Health website. <http://www.health.gov.au/internet/msac/publishing.nsf/Content/1276-public>. Updated 12<sup>th</sup> October 2016. Accessed September 12 2019.
3. Arbyn M VF, Snijders PJF, Verhoef VM, Suonio E, Dillner J et. al,. Accuracy of human papillomavirus testing on self-collected versus clinician-collected samples: a meta-analysis. *Lancet Oncol*. 2014;15(2):172-183. doi: 10.1016/S1470-2045(13)70570-9
4. Dodd RH, Obermair HM, McCaffery KJ. A Thematic Analysis of Attitudes Toward Changes to Cervical Screening in Australia. *JMIR Cancer*. 2019;5(1):e12307. doi: 10.2196/12307.

- 1  
2  
3 5. McCaffery K, Waller J, Nazroo J, Wardle J. Social and psychological impact of HPV testing in  
4 cervical screening: a qualitative study. *Sex Transm Infect.* 2006;82(2):169-174. doi:  
5 10.1136/sti.2005.016436.  
6  
7
- 8 6. Daley EM, Perrin KM, McDermott RJ, et al. The psychosocial burden of HPV: a mixed-method  
9 study of knowledge, attitudes and behaviors among HPV+ women. *J Health Psychol.*  
10 2010;15(2):279-290. doi: 10.1177/1359105309351249.  
11  
12
- 13 7. Kwok C, White K, Roydhouse J. Chinese-Australian Women's Knowledge, Facilitators and  
14 Barriers Related to Cervical Cancer Screening: A Qualitative Study. *J Immigr Minor Health.*  
15 2011;13(6):1076-1083. doi: 10.1007/s10903-011-9491-4.  
16  
17
- 18 8. Anaman-Torgbor JA, King J, Correa-Velez I. Barriers and facilitators of cervical cancer  
19 screening practices among African immigrant women living in Brisbane, Australia. *Eur J*  
20 *Oncol Nurs.* 2017;31:22-29. doi: 10.1016/j.ejon.2017.09.005.  
21  
22
- 23 9. NVivo for Windows, Version 12 Plus. Melbourne, Vic:QSR International Pty Ltd.  
24
- 25 10. McRae J, Martin C, O'Leary J, Sharp L, on behalf of the Irish Cervical Screening Research  
26 Consortium (CERVIA). "If you can't treat HPV, why test for it?" Women's attitudes to the  
27 changing face of cervical cancer prevention: a focus group study. *BMC Womens Health.*  
28 2014;14:64. doi: 10.1186/1472-6874-14-64.  
29  
30
- 31 11. Elit L. Role of cervical screening in older women. *Maturitas.* 2014;79(4):413-420. doi:  
32 10.1016/j.maturitas.2014.09.012.  
33  
34
- 35 12. Cancer Council Australia Cervical Screening Guidelines Working Party. National Cervical  
36 Screening Program: Guidelines for the management of screen-detected abnormalities,  
37 screening in specific populations and investigation of abnormal vaginal bleeding. Cancer  
38 Council Australia: Clinical Guidelines Network website.  
39  
40  
41 [https://wiki.cancer.org.au/australia/Guidelines:Cervical\\_cancer/Screening/Medical\\_Services](https://wiki.cancer.org.au/australia/Guidelines:Cervical_cancer/Screening/Medical_Services_Advisory_Committee_recommendations_for_HPV_testing)  
42 [\\_Advisory\\_Committee\\_recommendations\\_for\\_HPV\\_testing](https://wiki.cancer.org.au/australia/Guidelines:Cervical_cancer/Screening/Medical_Services_Advisory_Committee_recommendations_for_HPV_testing). Published 2017. Accessed  
43  
44 September 12, 2019.  
45
- 46 13. Cooper Robbins SC, Bernard D, McCaffery K, Brotherton J, Garland S, Skinner SR. "Is cancer  
47 contagious?": Australian adolescent girls and their parents: making the most of limited  
48 information about HPV and HPV vaccination. *Vaccine.* 28(19):3398-3408. doi:  
49 10.1016/j.vaccine.2010.02.078.  
50  
51
- 52 14. Zhang J, Le G, Larochelle D, et al. Facts or stories? How to use social media for cervical  
53 cancer prevention: A multi-method study of the effects of sender type and content type on  
54 increased message sharing. *Prev Med.* Sep 2019;126:105751. doi:  
55  
56  
57  
58  
59 10.1016/j.ypmed.2019.105751.  
60



- 1  
2  
3  
4  
5  
6  
7  
8  
9  
10  
11  
12  
13  
14  
15  
16  
17  
18  
19  
20  
21  
22  
23  
24  
25  
26  
27  
28  
29  
30  
31  
32  
33  
34  
35  
36  
37  
38  
39  
40  
41  
42  
43  
44  
45  
46  
47  
48  
49  
50  
51  
52  
53  
54  
55  
56  
57  
58  
59  
60
15. Jayasinghe Y, Rangiah C, Gorelik A, et al. Primary HPV DNA based cervical cancer screening at 25 years: Views of young Australian women aged 16-28 years. *J Clin Virol.* 2016;76 Suppl 1:S74-S80. doi: 10.1016/j.jcv.2015.10.026.
  16. Pitts MK, Dyson SJ, Rosenthal DA, Garland SM. Knowledge and awareness of human papillomavirus (HPV): attitudes towards HPV vaccination among a representative sample of women in Victoria, Australia. *Sex Health.* 2007;4(3):177-180.
  17. Chorley AJ, Marlow LAV, Forster AS, Haddrell JB, Waller J. Experiences of cervical screening and barriers to participation in the context of an organised programme: a systematic review and thematic synthesis. *Psycho-Oncol.* 2017;26(2):161-172. doi: 10.1002/pon.4126.

## Tables

Table 1: Demographic Tables

| Participant | Age | Screening Status <sup>1</sup> |
|-------------|-----|-------------------------------|
| P1          | 41  | Well-screened                 |
| P2          | 42  | Under-screened                |
| P3          | 43  | Well-screened                 |
| P4          | 53  | Well-screened                 |
| P5          | 30  | Well-screened                 |
| P6          | 55  | Well-screened                 |
| P7          | 58  | Well-screened                 |
| P8          | 33  | Well-screened                 |
| P9          | 20  | Well-screened                 |
| P10         | 22  | Well-screened                 |
| P11         | 57  | Well-screened                 |
| P12         | 36  | Well-screened                 |
| P13         | 38  | Well-screened                 |
| P14         | 35  | Under-screened                |

Notes: <sup>1</sup>Participants were considered well-screened if they had participated in screening the last two years. Under-screened participants had not been screened in over two years or had never been screened.

1  
2  
3  
4  
5  
6  
7  
8  
9  
10  
11  
12  
13  
14  
15  
16  
17  
18  
19  
20  
21  
22  
23  
24  
25  
26  
27  
28  
29  
30  
31  
32  
33  
34  
35  
36  
37  
38  
39  
40  
41  
42  
43  
44  
45  
46  
47  
48  
49  
50  
51  
52  
53  
54  
55  
56  
57  
58  
59  
60

For peer review only

Table 2: Themes and Illustrative Quotes

| Theme                    |                                |                                                                                                                                                                                                                                                                                                                                                                                                     |
|--------------------------|--------------------------------|-----------------------------------------------------------------------------------------------------------------------------------------------------------------------------------------------------------------------------------------------------------------------------------------------------------------------------------------------------------------------------------------------------|
| <b>Attitudes to NCSP</b> | Fear of missing cancer         |                                                                                                                                                                                                                                                                                                                                                                                                     |
|                          | A woman's body changes quickly | So obviously, it's important to try and catch it early and a couple of years can make a huge difference. So, I think it probably would have been better if they left it the way that it was. (P10)<br><br>But like stretching it out that bit further, it worries me that is something going to happen and by the time they come around to screening again, is it going to be too late for me? (P4) |
|                          | Missing non-HPV cancer         | If we miss that 1%, what's that out of 100? That's still one person. One person out of every hundred we're missing, that's sad. That's someone's mother, someone's daughter. (P12)<br><br>I would think put some women at risk, that are not exposed to HPV and would get it otherwise. (P2)                                                                                                        |
|                          | Women will forget              | And then it will get to that five years and people will still go, 'Well I'll just wait another 6 months.' (P5)<br><br>I think there will be too many people that get complacent and I think because of it too many people will get sick. (P12)                                                                                                                                                      |

1  
2  
3  
4  
5  
6  
7  
8  
9  
10  
11  
12  
13  
14  
15  
16  
17  
18  
19  
20  
21  
22  
23  
24  
25  
26  
27  
28  
29  
30  
31  
32  
33  
34  
35  
36  
37  
38  
39  
40  
41  
42  
43  
44  
45  
46

|                      |                                                                                                                                                                                                                                 |
|----------------------|---------------------------------------------------------------------------------------------------------------------------------------------------------------------------------------------------------------------------------|
| Personal Experiences | Considering that I've had smears that have been not... a little bit concerning, I'd be concerned about that. (P8)<br>A friend of mine got cervical cancer when she was 21... If they didn't catch it early, she'd be dead. (P2) |
|----------------------|---------------------------------------------------------------------------------------------------------------------------------------------------------------------------------------------------------------------------------|

Younger women are at greater risk

|                         |                                                                                                                                                               |
|-------------------------|---------------------------------------------------------------------------------------------------------------------------------------------------------------|
| Earlier sexual activity | A lot of children are starting to have sex at 13,14. At 25, for some kids that's over 10 years that kids are sexually active before they have screening. (P3) |
|-------------------------|---------------------------------------------------------------------------------------------------------------------------------------------------------------|

|                       |                                                                                                                                                                                                                                                                                                                              |
|-----------------------|------------------------------------------------------------------------------------------------------------------------------------------------------------------------------------------------------------------------------------------------------------------------------------------------------------------------------|
| Vaccine effectiveness | Depends on how good the vaccination is and the stats around how effective that is. Because we know that vaccinations aren't 100%. (P8)<br>Maybe that's what contributed to the 25 age testing that a lot of younger women have had the Gardasil vaccine but even then, a lot of parents won't let their kids have that. (P5) |
|-----------------------|------------------------------------------------------------------------------------------------------------------------------------------------------------------------------------------------------------------------------------------------------------------------------------------------------------------------------|

|                               |                                                                                                                                                                                                                                   |
|-------------------------------|-----------------------------------------------------------------------------------------------------------------------------------------------------------------------------------------------------------------------------------|
| More young people have cancer | And I've heard that there has been cases of younger ones getting cervical cancer. Stuff that normally you don't see til you are older and now coming up in younger women. (P4)<br>I think younger people are at higher risk. (P2) |
|-------------------------------|-----------------------------------------------------------------------------------------------------------------------------------------------------------------------------------------------------------------------------------|

Change is good

|                   |                                                                                                           |
|-------------------|-----------------------------------------------------------------------------------------------------------|
| Trust in medicine | I think I've got faith in the doctors because there must be a reason as to why they are doing that. (P11) |
|-------------------|-----------------------------------------------------------------------------------------------------------|

|    |                             |                                                                                         |
|----|-----------------------------|-----------------------------------------------------------------------------------------|
| 1  |                             |                                                                                         |
| 2  |                             |                                                                                         |
| 3  |                             |                                                                                         |
| 4  |                             |                                                                                         |
| 5  | Reduced discomfort          | Well I like the idea of not having to go back every 2 years and not be in that          |
| 6  |                             | uncomfortable position. (P14)                                                           |
| 7  |                             |                                                                                         |
| 8  |                             |                                                                                         |
| 9  |                             |                                                                                         |
| 10 | Earlier detection of cancer | I guess it starts somewhere doesn't it. If they pick up one thing, they can prevent it  |
| 11 |                             | from leading to something else. (P13)                                                   |
| 12 |                             |                                                                                         |
| 13 |                             |                                                                                         |
| 14 |                             |                                                                                         |
| 15 | <b>Screening Beliefs</b>    | <b>Personal</b>                                                                         |
| 16 |                             |                                                                                         |
| 17 | To be healthy               | Just because I want to be healthy, like I go to the dentist and have a normal check     |
| 18 |                             | up every year. This is part of the routine. (P11)                                       |
| 19 |                             |                                                                                         |
| 20 |                             |                                                                                         |
| 21 |                             |                                                                                         |
| 22 | To be there for family      | It wouldn't just affect me, it would affect my whole family. I couldn't be selfish like |
| 23 |                             | that, to not get it done for whatever reason. Because, once you're gone... you've       |
| 24 |                             | left and not destroyed but you've upset your whole family by not going to look after    |
| 25 |                             | yourself when it's just a simple test. (P4)                                             |
| 26 |                             |                                                                                         |
| 27 |                             |                                                                                         |
| 28 |                             |                                                                                         |
| 29 |                             |                                                                                         |
| 30 | Hx cancer/abnormal smears   | My grandma got really sick with cancer and so it kind of has impacted me to make        |
| 31 |                             | sure I try and look after myself. (P10)                                                 |
| 32 |                             |                                                                                         |
| 33 |                             | A long time ago I did have an abnormal smear. So, I guess knowing that, not wanting     |
| 34 |                             | to go through that again making sure I'm keeping on top of that, so it doesn't          |
| 35 |                             | happen again. (P13)                                                                     |
| 36 |                             |                                                                                         |
| 37 |                             |                                                                                         |
| 38 |                             |                                                                                         |
| 39 |                             |                                                                                         |
| 40 |                             |                                                                                         |
| 41 |                             |                                                                                         |
| 42 |                             |                                                                                         |
| 43 |                             |                                                                                         |
| 44 |                             |                                                                                         |
| 45 |                             |                                                                                         |
| 46 |                             |                                                                                         |

1  
2  
3  
4  
5  
6  
7  
8  
9  
10  
11  
12  
13  
14  
15  
16  
17  
18  
19  
20  
21  
22  
23  
24  
25  
26  
27  
28  
29  
30  
31  
32  
33  
34  
35  
36  
37  
38  
39  
40  
41  
42  
43  
44  
45  
46

Practitioner

Feeling comfortable

As long as I felt comfortable with the doctor. Their bedside manner was nice, they were clean, the instruments they used was sterile, they followed all their proper PPE precautions. (P12)

Trust in regular GP

I always just go to my GP. (P9)  
... because I had been going to him for a long time. (P4)

Male Practitioner

I just feel more comfortable with a female because I'm female (P11)

**Potential Interventions** Education Programs

And that the girls should be learning about it at school in their health and wellness classes as well so that as maturing adults they are aware of what is going on in their own bodies. (P3)

Kids these days get information from their friends, if their parents don't talk to them about it. So, if you are one of those parents that doesn't, your children are going to take information from their friends that might be incorrect. (P5)

General Practitioner

The GP would be good. You listen to them. Even if they give you a piece of paper, you go read that. (P6)

I do think that it would be a good idea that when you are having a pap smear the doctor talks to you about the relationship between cervical cancer and other issues and stuff (P3)

1  
2  
3  
4  
5  
6  
7  
8  
9  
10  
11  
12  
13  
14  
15  
16  
17  
18  
19  
20  
21  
22  
23  
24  
25  
26  
27  
28  
29  
30  
31  
32  
33  
34  
35  
36  
37  
38  
39  
40  
41  
42  
43  
44  
45  
46

Media Campaign

So just put it on my Facebook screen or my Instagram or something like that. So then, y'know that I can click on it and it's private. (P2)

It's something that should be spoken about more, y'know. And I just think advertising on tv would be a strong starting point (P12)

I feel like people need to hear about the stories of people actually having cancer. I think the scare factor is pretty effective for young people. (P8)

Improving cost and accessibility

I think anything to do with those tests (cervical screening) should come with a bulk billing visit for women because it is a deterrent for going to your GP. (P5)

And if you did like pop up clinics because you know they always have pop up Red Cross Blood Van (P9)



1  
2  
3  
4  
5  
6  
7  
8  
9  
10  
11  
12  
13  
14  
15  
16  
17  
18  
19  
20  
21  
22  
23  
24  
25  
26  
27  
28  
29  
30  
31  
32  
33  
34  
35  
36  
37  
38  
39  
40  
41  
42  
43  
44  
45  
46

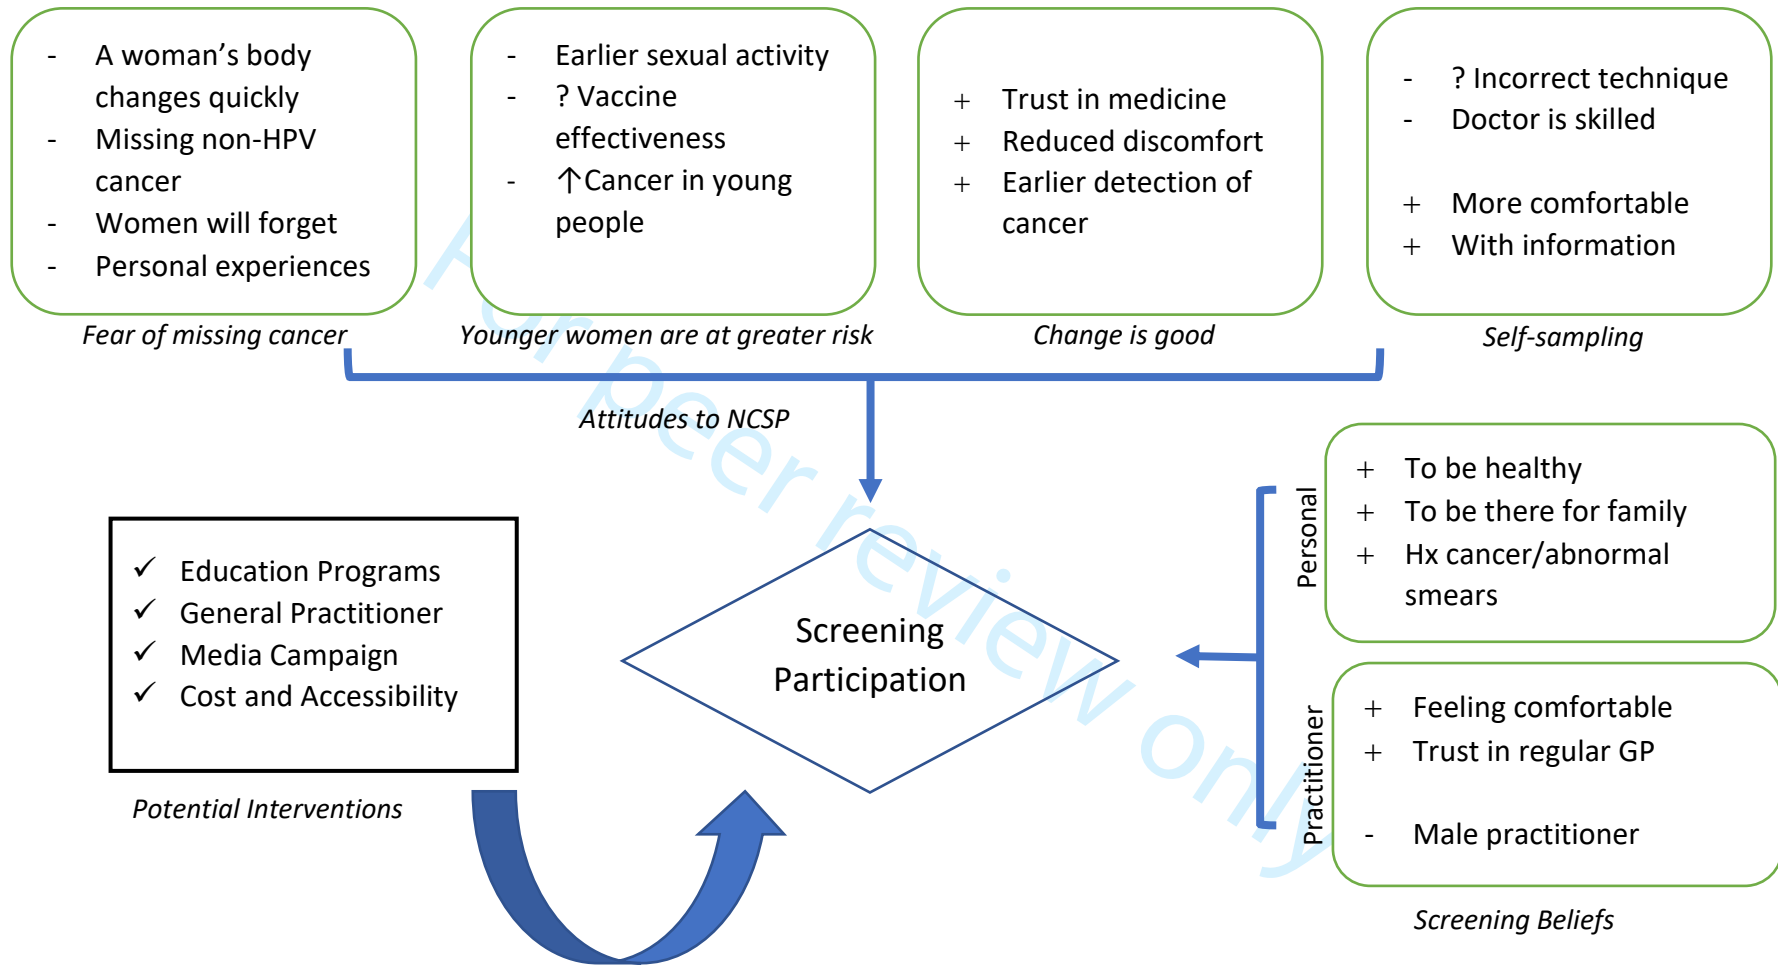

## COREQ (COnsolidated criteria for REporting Qualitative research) Checklist

A checklist of items that should be included in reports of qualitative research. You must report the page number in your manuscript where you consider each of the items listed in this checklist. If you have not included this information, either revise your manuscript accordingly before submitting or note N/A.

| Topic                                          | Item No. | Guide Questions/Description                                                                                                                              | Reported on Page No. |
|------------------------------------------------|----------|----------------------------------------------------------------------------------------------------------------------------------------------------------|----------------------|
| <b>Domain 1: Research team and reflexivity</b> |          |                                                                                                                                                          |                      |
| <i>Personal characteristics</i>                |          |                                                                                                                                                          |                      |
| Interviewer/facilitator                        | 1        | Which author/s conducted the interview or focus group?                                                                                                   |                      |
| Credentials                                    | 2        | What were the researcher's credentials? E.g. PhD, MD                                                                                                     |                      |
| Occupation                                     | 3        | What was their occupation at the time of the study?                                                                                                      |                      |
| Gender                                         | 4        | Was the researcher male or female?                                                                                                                       |                      |
| Experience and training                        | 5        | What experience or training did the researcher have?                                                                                                     |                      |
| <i>Relationship with participants</i>          |          |                                                                                                                                                          |                      |
| Relationship established                       | 6        | Was a relationship established prior to study commencement?                                                                                              |                      |
| Participant knowledge of the interviewer       | 7        | What did the participants know about the researcher? e.g. personal goals, reasons for doing the research                                                 |                      |
| Interviewer characteristics                    | 8        | What characteristics were reported about the interviewer/facilitator? e.g. Bias, assumptions, reasons and interests in the research topic                |                      |
| <b>Domain 2: Study design</b>                  |          |                                                                                                                                                          |                      |
| <i>Theoretical framework</i>                   |          |                                                                                                                                                          |                      |
| Methodological orientation and Theory          | 9        | What methodological orientation was stated to underpin the study? e.g. grounded theory, discourse analysis, ethnography, phenomenology, content analysis |                      |
| <i>Participant selection</i>                   |          |                                                                                                                                                          |                      |
| Sampling                                       | 10       | How were participants selected? e.g. purposive, convenience, consecutive, snowball                                                                       |                      |
| Method of approach                             | 11       | How were participants approached? e.g. face-to-face, telephone, mail, email                                                                              |                      |
| Sample size                                    | 12       | How many participants were in the study?                                                                                                                 |                      |
| Non-participation                              | 13       | How many people refused to participate or dropped out? Reasons?                                                                                          |                      |
| <i>Setting</i>                                 |          |                                                                                                                                                          |                      |
| Setting of data collection                     | 14       | Where was the data collected? e.g. home, clinic, workplace                                                                                               |                      |
| Presence of non-participants                   | 15       | Was anyone else present besides the participants and researchers?                                                                                        |                      |
| Description of sample                          | 16       | What are the important characteristics of the sample? e.g. demographic data, date                                                                        |                      |
| <i>Data collection</i>                         |          |                                                                                                                                                          |                      |
| Interview guide                                | 17       | Were questions, prompts, guides provided by the authors? Was it pilot tested?                                                                            |                      |
| Repeat interviews                              | 18       | Were repeat interviews carried out? If yes, how many?                                                                                                    |                      |
| Audio/visual recording                         | 19       | Did the research use audio or visual recording to collect the data?                                                                                      |                      |
| Field notes                                    | 20       | Were field notes made during and/or after the interview or focus group?                                                                                  |                      |
| Duration                                       | 21       | What was the duration of the interviews or focus group?                                                                                                  |                      |
| Data saturation                                | 22       | Was data saturation discussed?                                                                                                                           |                      |
| Transcripts returned                           | 23       | Were transcripts returned to participants for comment and/or                                                                                             |                      |

| Topic                                  | Item No. | Guide Questions/Description                                                                                                        | Reported on Page No. |
|----------------------------------------|----------|------------------------------------------------------------------------------------------------------------------------------------|----------------------|
|                                        |          | correction?                                                                                                                        |                      |
| <b>Domain 3: analysis and findings</b> |          |                                                                                                                                    |                      |
| <i>Data analysis</i>                   |          |                                                                                                                                    |                      |
| Number of data coders                  | 24       | How many data coders coded the data?                                                                                               |                      |
| Description of the coding tree         | 25       | Did authors provide a description of the coding tree?                                                                              |                      |
| Derivation of themes                   | 26       | Were themes identified in advance or derived from the data?                                                                        |                      |
| Software                               | 27       | What software, if applicable, was used to manage the data?                                                                         |                      |
| Participant checking                   | 28       | Did participants provide feedback on the findings?                                                                                 |                      |
| <i>Reporting</i>                       |          |                                                                                                                                    |                      |
| Quotations presented                   | 29       | Were participant quotations presented to illustrate the themes/findings?<br>Was each quotation identified? e.g. participant number |                      |
| Data and findings consistent           | 30       | Was there consistency between the data presented and the findings?                                                                 |                      |
| Clarity of major themes                | 31       | Were major themes clearly presented in the findings?                                                                               |                      |
| Clarity of minor themes                | 32       | Is there a description of diverse cases or discussion of minor themes?                                                             |                      |

Developed from: Tong A, Sainsbury P, Craig J. Consolidated criteria for reporting qualitative research (COREQ): a 32-item checklist for interviews and focus groups. *International Journal for Quality in Health Care*. 2007. Volume 19, Number 6: pp. 349 – 357

**Once you have completed this checklist, please save a copy and upload it as part of your submission. DO NOT include this checklist as part of the main manuscript document. It must be uploaded as a separate file.**

# BMJ Open

## Knowledge and perspectives of the new National Cervical Screening Program: a semi-structured interview study of North Queensland women – “I could be that one percent”

|                                 |                                                                                                                                                                                                                                                                                   |
|---------------------------------|-----------------------------------------------------------------------------------------------------------------------------------------------------------------------------------------------------------------------------------------------------------------------------------|
| Journal:                        | <i>BMJ Open</i>                                                                                                                                                                                                                                                                   |
| Manuscript ID                   | bmjopen-2019-034483.R1                                                                                                                                                                                                                                                            |
| Article Type:                   | Original research                                                                                                                                                                                                                                                                 |
| Date Submitted by the Author:   | 11-Dec-2019                                                                                                                                                                                                                                                                       |
| Complete List of Authors:       | Nagendiram, Archana; James Cook University Mackay Education and Research Centre,<br>Bidgood, Rachel; Canelands Medical Centre<br>Banks, Jennifer; James Cook University, School of Medicine and Dentistry<br>Heal, Clare; James Cook University, School of Medicine and Dentistry |
| <b>Primary Subject Heading</b>: | General practice / Family practice                                                                                                                                                                                                                                                |
| Secondary Subject Heading:      | Obstetrics and gynaecology, Public health                                                                                                                                                                                                                                         |
| Keywords:                       | Community gynaecology < GYNAECOLOGY, Public health < INFECTIOUS DISEASES, Gynaecological oncology < ONCOLOGY, PREVENTIVE MEDICINE                                                                                                                                                 |
|                                 |                                                                                                                                                                                                                                                                                   |

SCHOLARONE™  
Manuscripts



I, the Submitting Author has the right to grant and does grant on behalf of all authors of the Work (as defined in the below author licence), an exclusive licence and/or a non-exclusive licence for contributions from authors who are: i) UK Crown employees; ii) where BMJ has agreed a CC-BY licence shall apply, and/or iii) in accordance with the terms applicable for US Federal Government officers or employees acting as part of their official duties; on a worldwide, perpetual, irrevocable, royalty-free basis to BMJ Publishing Group Ltd ("BMJ") its licensees and where the relevant Journal is co-owned by BMJ to the co-owners of the Journal, to publish the Work in this journal and any other BMJ products and to exploit all rights, as set out in our [licence](#).

The Submitting Author accepts and understands that any supply made under these terms is made by BMJ to the Submitting Author unless you are acting as an employee on behalf of your employer or a postgraduate student of an affiliated institution which is paying any applicable article publishing charge ("APC") for Open Access articles. Where the Submitting Author wishes to make the Work available on an Open Access basis (and intends to pay the relevant APC), the terms of reuse of such Open Access shall be governed by a Creative Commons licence – details of these licences and which [Creative Commons](#) licence will apply to this Work are set out in our licence referred to above.

Other than as permitted in any relevant BMJ Author's Self Archiving Policies, I confirm this Work has not been accepted for publication elsewhere, is not being considered for publication elsewhere and does not duplicate material already published. I confirm all authors consent to publication of this Work and authorise the granting of this licence.

1  
2  
3  
4  
5 Knowledge and perspectives of the new National  
6  
7  
8  
9 Cervical Screening Program: a semi-structured  
10  
11  
12  
13  
14 interview study of North Queensland women – “I  
15  
16  
17  
18 could be that one percent”  
19  
20  
21

22 Dr Archana Nagendiram<sup>1</sup>  
23 archana.nagendiram@my.jcu.edu.au  
24

25 Dr Rachel Bidgood<sup>2</sup>  
26 dr.bidgood@onestopmedical.com.au  
27

28 Dr Jennifer Banks<sup>1</sup>  
29 Jennifer.banks2@jcu.edu.au  
30

31 Professor Clare Heal<sup>1</sup>  
32 clare.heal@jcu.edu.au  
33  
34  
35  
36

37 <sup>1</sup> Mackay Clinical School  
38 College of Medicine and Dentistry  
39 James Cook University  
40 Level 1, Building K  
41 Mackay Base Hospital  
42 Mackay, QLD  
43 Australia 4740  
44  
45 Phone: 07 4885 7142  
46  
47 Fax: 07 4885 7111  
48

49 <sup>2</sup> Canelands Medical Centre  
50 Shop 2126, Canelands Shopping Centre  
51 2 Mangrove Rd  
52 Mackay, QLD  
53 Australia 4740  
54  
55 Phone: 07 49511411  
56  
57 Fax: 07 4953 4272  
58  
59  
60

1  
2  
3 Key words: Cervix Uteri, mass screening, Australia, Early detection of cancer, attitude  
4  
5  
6

7 Word count 3888 words  
8  
9  
10  
11  
12  
13  
14

## 15 Abstract

### 16 *Objectives*

17  
18 To investigate women's understanding and attitudes towards the National Cervical Screening  
19 Program (NCSP) and to explore methods to improve screening participation.  
20  
21  
22

### 23 *Design*

24  
25 Semi-structured face to face interviews were conducted through convenience and snowball  
26 sampling. Thematic analysis occurred using the interpretivist framework.  
27  
28  
29

### 30 *Setting*

31  
32 A private general practice in North Queensland.  
33  
34

### 35 *Participants*

36  
37 Women between the ages of 18 to 74 who attended the general practice were eligible to participate.  
38 Fourteen women between 20 and 58 years old were interviewed.  
39  
40

### 41 *Results*

42  
43 Participants were concerned that the new NCSP would miss cancer due to longer screening intervals  
44 and reliance on primary HPV testing. They believed that young women are at increased risk of  
45 cervical cancer, due to perceived HPV vaccine ineffectiveness and parent objection to vaccination.  
46 Most participants were not agreeable to self-sampling and preferred their doctor to perform  
47 screening. Personal and practitioner beliefs influenced a woman's screening participation. Personal  
48 factors include being healthy for themselves and their family, previous abnormal smears and family  
49 history of cancer. Emphasis was placed on feeling 'comfortable' with their practitioner which  
50 included patient rapport and gender preference. Proposed methods to improve cervical screening  
51 included education programs, advertising campaigns, general practitioner interventions and  
52 improving accessibility.  
53  
54  
55  
56  
57  
58  
59  
60

### Conclusions

It is apparent that women are hesitant about the new NCSP. However, when provided with additional information they were more amenable to the changes. This highlights the need to improve awareness of cervical screening and the new NCSP.

## Article Summary

### Strengths and limitations of this study

- Interviews explored participants' attitudes towards the new NCSP, where there is currently little research.
- Individual interviews were conducted until theoretical data saturation and the interview template was piloted.
- Convenience and snowball sampling through a private general practice may have led to inaccurate sample representation.
- Most participants were well-screened for cervical cancer, which may not be inclusive of high risk groups.
- The study was completed in an outer regional centre and may not apply to the general Australian population.

## Background

While the National Cervical Screening program (NCSP) has more than halved cervical cancer mortality, only 54-56% of eligible Australian women<sup>1</sup> participated in screening between January 2016-June 2017. This is especially concerning as over 90% of women diagnosed with cervical cancer were under-screened or never-screened.<sup>2</sup> Women from lower socioeconomic status, rural areas or those that identify as Aboriginal and Torres Strait Islander have lower screening participation rates and higher cervical cancer mortality.<sup>1</sup> Recently, the NCSP has been changed and has moved away from traditional pap smears towards a 5 yearly cervical screening test (CST) with for Human Papilloma Virus (HPV) and reflex cytology.<sup>2</sup> Australian women begin cervical screening at 25 years old and have an exit CST from 70-74 years old. Women over 30 years who have never been or are currently under-screened are also eligible for self-sampling, consisting of a high vaginal swab for HPV.<sup>2,3</sup>



1  
2  
3 As per the World Health Organisation guidelines, there has been a global shift to HPV-based cervical  
4 screening.<sup>4</sup> Worldwide, countries including the United Kingdom, Ireland, Netherlands and Turkey  
5 have implemented national HPV-based cervical screening, with many more transitioning towards  
6 primary HPV testing.<sup>5,6</sup> Previous international studies stated most women are unaware of the use of  
7 primary HPV testing<sup>7</sup> and that some women may experience a negative emotional response towards  
8 primary HPV testing as it is a sexually transmitted infection<sup>8,9</sup>. Due to the recent nature of changes to  
9 cervical screening, there is limited qualitative literature assessing Australian women's attitudes  
10 towards the new NCSP. One Australian study used thematic analysis of an online petition against the  
11 new NCSP, revealing that the greatest concerns were missing cancer due to prolonged screening  
12 intervals and the delay in screening age.<sup>10</sup>

13  
14  
15 The researchers' primary aim is to explore North Queensland women's awareness and perceptions  
16 of the new NCSP. Knowledge of cervical cancer, factors that affect screening participation and  
17 methods to improve screening awareness were also investigated.

## 27 Methods

28  
29 Authors followed the Consolidated Criteria for Reporting Qualitative Health Research (COREQ).

### 30 Patient selection and setting

31  
32 Women between 18-74 years old who attended a specific North Queensland general practice were  
33 eligible for this study with convenience and snowball sampling. This project was conducted with a  
34 concurrent quantitative survey. Receptionists provided waiting room surveys and an expression of  
35 interest form for a follow-up interview. Quantitative results collected through waiting room surveys  
36 will be published separately. The interviews were advertised on the practice's Facebook page and  
37 participants were encouraged to promote the study to their family and friends. Women who  
38 expressed interest were contacted by phone or email.

### 39 Data collection

40  
41 A semi-structured, face-to-face individual interview was conducted at the participant's convenience  
42 at their home or a hospital meeting room between March and April 2019. The average length of the  
43 interview was 20 minutes. All interviews were conducted by the primary author, a female medical  
44 student (AN) with training in qualitative research. The interviewer (AN) may have some personal bias  
45 as she is eligible for cervical screening. No participants were known to AN and participants were  
46 aware that this interview was part of an Honours project.

47  
48 The piloted interview guide included questions about knowledge of cervical cancer and screening,  
49 opinions regarding the NCSP, barriers to screening and thoughts to improve screening participation.

1  
2  
3 During the interview, participants were asked their opinions of the new NCSP, both with their  
4 baseline knowledge and after the interviewer provided basic information on the program.  
5  
6 Additionally, the interviewer determined screening status in the interview. Screening status was  
7  
8 defined using the previous guidelines due to the current transition to the new NCSP. A 'well-  
9  
10 screened' participant had undergone cervical screening in the last two years while, an 'under-  
11  
12 screened' participant was overdue for screening.

13  
14 The interview guide (Appendix 1) was developed after analysis of the existing literature<sup>11,12</sup> and  
15  
16 discussion amongst the investigators, including a general practitioner and a research officer, both  
17  
18 experienced in qualitative research. Prior to the interview, participants signed a consent form for the  
19  
20 interview to be audio recorded. The interviews were transcribed verbatim, including notes on non-  
21  
22 verbal cues and were uploaded to nVivo. Transcribed interviews were not returned to participants  
23  
24 for comments as there was no ambiguity that required clarification. Further, some methodological  
25  
26 literature suggests it may provide little benefit to improving data accuracy and it may lead to  
27  
28 misrepresentation of the original data.<sup>13</sup> No repeat interviews were conducted. Data collection  
29  
30 continued until theoretical data saturation was achieved.

### 31 **Patient and public involvement**

32 No participants were involved with the development of this study protocol or data analysis.

### 34 **Data analysis**

35  
36 Transcribed interviews were analysed using NVivo 12<sup>14</sup> using thematic analysis and the interpretivist  
37  
38 paradigm. Data was analysed under relevant headings, for example 'Attitudes towards NCSP' and  
39  
40 'Factors affecting screening participation' but no themes were predetermined. AN completed line-  
41  
42 by-line coding to identify the preliminary themes and codes in the data, which was validated by  
43  
44 another author (JB) with no significant changes to coding required. Data was further analysed to  
45  
46 cluster themes under the appropriate research questions to create a thematic schema.

### 47 **Ethical Considerations**

48  
49 Ethical approval was provided by the James Cook University Human Research Ethics Committee  
50  
51 (H7465). Participants completed a consent form that stated that they agreed to a recorded  
52  
53 interview.

## 56 **Results**

### 59 **Participant Characteristics**

1  
2  
3 Twenty-eight women expressed interest to be interviewed and were contacted by phone or email.  
4  
5 Fourteen women consented to be interviewed, with four participants identified by convenience  
6  
7 sampling and ten by snowball recruitment. Table 1 displays individual participant characteristics. The  
8  
9 age of participants ranged between 20 and 58 years old. Most women participated in screening and  
10  
11 only two were considered under-screened as per the previous NCSP.

## 12 Themes

13  
14 Thematic analysis revealed three major themes on participant's attitudes towards the NCSP: 'Fear of  
15  
16 missing cancer', 'younger women are at greater risk,' 'self-sampling' and 'change is good'. Screening  
17  
18 beliefs were subdivided into personal and practitioner factors. Based on participants' suggestions,  
19  
20 four potential intervention strategies emerged. Table 2 displays illustrative quotes for these themes.  
21  
22 A thematic schema depicting conceptual links throughout the themes is displayed in Figure 1.

## 23 Knowledge of Cervical Cancer and NCSP

24  
25 Participants identified genetics and infection as the main causes of cervical cancer. Most participants  
26  
27 did not specify HPV as the main cause of cervical cancer but when asked, participants were  
28  
29 frequently aware of the link between HPV and cervical cancer. Hormones, contraceptive pill,  
30  
31 smoking and toxins were listed by participants as causes of cervical cancer. Women considered  
32  
33 family history and sexual activity the main risk factors for cervical cancer. Other risk factors included  
34  
35 not participating in regular screening, previous abnormal smears and being unvaccinated.  
36  
37 Participants believed abnormal bleeding and pain were symptoms of cervical screening though,  
38  
39 many women were unsure of the symptoms. Bloating, abnormal discharge and pain during sex  
40  
41 (dyspareunia) were also reported by some participants as symptoms of cervical cancer.

42  
43 Participants understood that cervical screening occurs using pap smears and often could describe  
44  
45 that pap smears look for abnormal cells. Some participants were aware of the change to screening  
46  
47 and could correctly identify that screening was now 5-yearly. Women stated that cervical screening  
48  
49 should occur in their early twenties and some said that it began with the onset of sexual activity.

## 50 Attitudes towards the new NCSP

### 51 FEAR OF MISSING CANCER

52  
53 Participants were anxious that 5 years was 'a long time for cancer to grow' (P12) and may lead to  
54  
55 more women diagnosed with cancer. More regular screening was identified as having 'a better  
56  
57 chance of picking something up' (P14) as 'things in our body change very quickly' (P1). There were  
58  
59 fears that increased screening intervals may miss cancer, as clinicians may not always get a 'clear  
60  
swab' (P8) and hence more regular screening was preferable. Additionally, participants were

1  
2  
3 apprehensive that primary HPV testing would miss cancer caused by 'things other than HPV' (P9).  
4 They were uncomfortable with the CST not testing for abnormal cells as 'I could be that one percent'  
5 (P12) with cervical cancer not caused by HPV. Subsequently, some participants preferred co-testing  
6 for both HPV and abnormal cells to receive the benefits of both screening methods.  
7  
8

9  
10 Women believed that 'every 2 years is easy enough to recall but not 5 years' (P12) and may not  
11 remember to participate in screening, due to increased screening intervals. Participants were  
12 concerned that increased screening intervals will make women more 'complacent' (P12) in their  
13 screening behaviour and will delay screening even longer. They proposed that increased intervals  
14 required a register to provide appropriate reminders to women. A participant stated that increased  
15 intervals may also affect the feasibility of contacting patients, as after five years 'not everyone lives  
16 at the same address' (P7).  
17  
18

19 Those with a history of previous abnormal smears thought 5 yearly screening was 'a little bit  
20 concerning' (P8). Participants who had family or friends with cervical cancer were concerned by the  
21 increased screening interval as 'they didn't pick up hers until it was too late' (P4). One participant  
22 negatively viewed delaying screening until a woman is 25 years, as her friend was diagnosed with  
23 cervical cancer earlier than this, and 'if they didn't catch it early, she'd be dead' (P2). These personal  
24 experiences with abnormal smears or cervical cancer made women more 'paranoid' (P4) about  
25 cervical cancer.  
26  
27

#### 28 YOUNG WOMEN ARE AT GREATER RISK

29 Participants perceived that commencing screening from 25 years old, placed women at increased  
30 risk for cancer due to earlier sexual activity of young women. Participants stated that children are  
31 'having sex a lot younger nowadays' (P13). They highlighted that as young women are sexually active  
32 from their early teens, it may be 'over 10 years that kids are sexually active before they have  
33 screening' (P3). Participants also believed that delaying cervical screening would prevent  
34 opportunistic testing for sexually transmitted infections in young women.  
35  
36

37 While some women identified that the introduction of the Gardasil vaccination was beneficial in  
38 reducing cervical cancer incidence, there was also a perception that 'a lot of parents won't let their  
39 kids have that' (P5). This raised concerns as to whether unvaccinated women would be protected  
40 under the new NCSP in the future. Additionally, participants feared that 'even though you are  
41 vaccinated you can still get diseases' (P7) and believed that delaying screening will lead to cervical  
42 cancer being missed in women under 25 years. Some participants thought that patients diagnosed  
43 with cancer are becoming 'younger and younger' (P2). Younger women were described to be at  
44  
45  
46  
47  
48  
49  
50  
51  
52  
53  
54  
55  
56  
57  
58  
59  
60

1  
2  
3 'higher risk' (P2) of cervical cancer and participants felt that earlier detection of cervical cancer in  
4 women would improve their survival rates.  
5

#### 6 7 CHANGE IS GOOD 8

9  
10 Several participants expressed their 'faith in the doctors' (P11) and believed that screening would  
11 not have changed without underlying improvements in science. They perceived that 'testing is that  
12 good' (P7) if screening intervals have increased from every 2 years to 5 years. Participants  
13 highlighted that HPV testing is a positive change as it would 'catch it (HPV)' (P11) before abnormal  
14 cells became detectable by a traditional pap smear. They accepted that if HPV was 'linked so  
15 strongly' (P9) with cervical cancer, primary HPV testing was a beneficial change to cervical screening.  
16 After participants were provided information on the new NCSP and cervical cancer's slow  
17 progression, they were more receptive towards the new guidelines. An additional benefit of the new  
18 NCSP was that reduced screening would 'make life easier' (P6) for women, as cervical screening was  
19 described as 'uncomfortable' (P14) by participants.  
20  
21  
22  
23  
24  
25

#### 26 27 SELF-SAMPLING 28

29  
30 Participants were generally hesitant to accept self-sampling as they did not 'feel confident enough in  
31 myself' (P14) to administer the test. This stemmed from the fear of incorrectly completing the test  
32 as they may not 'swab far enough' (P5) or that 'it might be contaminated' (P4). Doctors were  
33 thought to be better equipped to perform cervical screening as they had appropriate training to  
34 ensure it was 'done properly' (P8). It was perceived that doctors had better visualisation of the  
35 cervix as they used a speculum and would take a sample from 'the right places' (P3).  
36  
37  
38  
39

40  
41 Nonetheless, participants acknowledged that self-sampling would provide women 'more privacy'  
42 (P10) and could improve screening participation. The test was deemed to be 'less invasive' (P5) than  
43 traditional cervical screening, especially for those who have had previous negative experiences with  
44 cervical screening. Participants often had the misconception that self-sampling required a cervical  
45 swab. When informed it was in fact, a high-vaginal swab more participants reported they would  
46 consider self-sampling. Some participants indicated that they would complete self-sampling if they  
47 were provided instructions or shown by a practitioner. Women highlighted that technological  
48 improvements allowed for 'smaller traces' (P2) of HPV to be detected and this made self-sampling  
49 more acceptable.  
50  
51  
52  
53  
54  
55  
56  
57

#### 58 **Factors affecting screening participation** 59 60

## PERSONAL

Participants explained that cervical screening was a part of their normal health 'routine' (P11). Screening allowed them to have 'peace of mind' that they were healthy, and it allowed them to receive 'further help' (P1) if required. Many women emphasised that their family was the key reason they had cervical screening. They described their sense of responsibility to their family who required them to 'make the right choices' (P3) by undergoing screening. Participants disclosed that cancer could destroy their families and thus they chose to screen. A woman's personal experiences with cancer shaped her willingness to participate in cervical screening. A history of abnormal smears motivated women to 'keep on top' (P13) of their screening to prevent re-occurrence. Women with a family history of cancer had firsthand experience as to how it devastated their families, which motivated them to undergo regular cervical screening.

## PRACTITIONER

Several participants described feeling 'comfortable' (P10) with their general practitioner as a facilitator to screening participation. This feeling of being 'comfortable' was influenced by the doctor's bedside manner, professional behaviour and hygienic technique throughout the procedure. Some women expressed that they trusted their regular doctor due to their pre-existing relationship, as they have known them for a 'long time' (P4). Participants frequently mentioned their practitioner's gender when discussing screening participation. Most participants indicated that they are more 'comfortable' with a female doctor as she 'has the same bits' (P2). However, some women had no gender preference as cervical screening is 'just something that happens' (P7) and one participant thought that 'once you have a few kids, you're over it' (P4).

## Improving CST Awareness and Participation

### *Cost and Accessibility*

A lack of bulk-billed services in regional areas was identified by women as a key barrier to cervical screening participation. The cost of cervical screening was a 'deterrent' (P5) for attending the general practitioner for screening, especially in low socioeconomic women as 'their priority is probably not money for them, it's going to be feeding their children' (P5). Participants also emphasised that cervical screening is not bulk-billed, unlike breast and bowel cancer. Women expressed the need for increased accessibility of cervical screening, especially in regional communities. It was suggested that cervical screening should have 'pop-up' (P9) clinics, as seen with blood donation and breast screening.

### *Media Campaigns*

The role of a media campaign to potentially increase cervical screening awareness was discussed by participants. Participants proposed that television advertisements should be aired to encourage discussion about screening. Social media was deemed to be a valuable platform to educate women about cervical screening due to its 'really big role in young women's lives' (P9) and the interaction remained 'private' (P2). Women also suggested that an ambassador should lead the discussion on cervical cancer, such as in England when a celebrity 'found out on Big Brother that she had cervical cancer' (P3). Participants expressed that it is important to hear personal stories from survivors as it provides a 'scare factor' (P8) and would encourage screening.

### *Education Programs*

Participants explained the importance of education to improve screening participation, especially in schools through sex education to ensure young women have the 'right information' (P5) about HPV and cervical cancer. Education programs should inform women about the purpose of the Gardasil vaccine, the NCSP and symptoms of cervical cancer. Participants believed that education will reduce any fears related to screening and solidify 'how important it is' (P12). It was also suggested that education sessions should also occur at universities, playgroups and the workplace.

### *General Practitioner*

Participants emphasised the importance of their general practitioner as a trusted source of information about cervical screening as 'you listen to them' (P6). It was indicated that general practitioners should facilitate opportunistic discussions about screening, especially when a woman turned 25 years old. Practices should display information in the waiting rooms and provide written information such as pamphlets or fact sheets, with this information being 'very direct, black and white' (P1) to increase the likelihood that a woman will read it. It was also proposed that general practices should provide information by phone or email.

## Discussion

It became apparent that women were hesitant about the new NCSP, as they were apprehensive that screening will miss cancers due to primary HPV testing and increased screening intervals. A Canadian study by *Ogilvie et al.* stated that primary HPV testing was acceptable, though acceptability decreased when combined with increased screening intervals.<sup>15</sup> Participants' objections towards the change in screening may be due to the general public's fatalistic view of cancer and belief that frequent testing leads to earlier diagnosis.<sup>16</sup> A qualitative Irish study highlighted that even when

1  
2  
3 women understood HPV causes cancer, they were anxious about screening changes due to their  
4 attachment to traditional pap smears.<sup>17</sup> Participants were afraid that the new program would  
5 endanger young women as they were perceived to be at increased risk of cervical cancer. This was  
6 due to participant concerns that young women are becoming sexually active earlier and queries over  
7 the effectiveness of the Gardasil vaccine. In reality however, women over 50 years are at higher risk  
8 for cervical cancer and this misconception of age related risk may indicate the need for more patient  
9 education.<sup>18</sup> Moreover, the new screening program is predicted to have a greater impact in cervical  
10 cancer mortality in unvaccinated cohorts (36%) over vaccinated cohorts (29%).<sup>19</sup>

11 It is noteworthy that participants became accepting of HPV after they were provided additional  
12 information explaining the new NCSP. This is congruent with *Waller et al*<sup>20</sup> who described that  
13 women's anxieties surrounding HPV reduces as health literacy increases. Participants suggested a  
14 variety of methods to improve screening including education programs concentrating on young  
15 women. Minimal education about cervical cancer and HPV occurs in schools and parents perceived it  
16 is not their responsibility to educate their children on this topic, though school-based education  
17 programs were an acceptable solution to this.<sup>21</sup> Media and social media campaigns were proposed  
18 to increase awareness. Participants suggested the use of cancer survivors as ambassadors, though  
19 past research suggested an emphasis on information from organisations over personal anecdotes.<sup>22</sup>  
20 The general practitioner is a trusted and valued source of information and should provide  
21 interventional health education with eligible women.<sup>23,24</sup> A systematic literature review explains that  
22 patient's likelihood to participate in preventive screening is linked directly to the quality of  
23 discussion between clinician and patient, with an emphasis on shared decision making rather than a  
24 simple recommendation.<sup>25</sup> More research should occur in general practice to develop and evaluate  
25 interventions in an Australian context in order to improve cervical screening.

26  
27  
28  
29  
30  
31  
32  
33  
34  
35  
36  
37  
38  
39  
40  
41  
42 Finally, logistical concerns prevented women from participating in screening. Previous literature  
43 demonstrates that reducing economic and geographic barriers improve disadvantaged women's  
44 likelihood to participate in cervical screening.<sup>26</sup> Unlike other government mandated screening  
45 programs such as bowel and breast screening, for cervical cancer screening women bear the burden  
46 of cost when attending their appointment with their general practitioner. Government policymakers  
47 should reassess the costs involved in cervical screening and consider expanding the availability of  
48 bulk-billed services.

49  
50  
51  
52  
53  
54  
55 Screening participation is influenced by personal and practitioner factors. A woman's personal  
56 factors include: to be healthy, to be there for family, history of abnormal smears or cancer. A  
57 woman's comfort in her relationship with her practitioner influenced her screening behaviour. This  
58 was determined by trust in her regular doctor, gender preference and a general feeling of comfort. A  
59  
60



1  
2  
3 previous qualitative literature review similarly discussed that screening provides reassurance of  
4 health. Though unlike this study, it also iterated that the test was uncomfortable, embarrassing and  
5 previous negative experiences hindered participation.<sup>27</sup> This may be as the literature review  
6 encompassed studies that included under-screened populations, while this study only included two  
7 under-screened women.  
8  
9

10  
11  
12 This study provides timely qualitative research on participant's perceptions of the new NCSP and will  
13 provide valuable data on these changes. Researchers conducted interviews using a piloted interview  
14 template until theoretical data saturation. It was also conducted in parallel to a quantitative study as  
15 an explanatory component and allowed for data triangulation. However, sampling at one private  
16 regional general practice may have led to a skewed representation of the population and may not  
17 include high risk groups for cervical cancer. In addition, snowball sampling may have led to women  
18 with more positive health seeking behaviours to participate in this project. The use of the  
19 interpretivist paradigm may allow for the impact of the primary researcher bias (AN) though, this  
20 was minimised by a second author (JB) validating thematic analysis.  
21  
22  
23  
24  
25  
26  
27

## 28 Conclusion

29  
30  
31 Women are apprehensive about the new changes to the NCSP, as they believe that increased  
32 screening intervals and primary HPV testing may lead to missed cervical cancers. Personal and  
33 practitioner factors affect screening participation, with emphasis on maintaining good health and  
34 feeling 'comfortable' with their doctor. Cervical cancer participation could be improved by increasing  
35 education about cervical cancer and the new NCSP through schools, advertising campaigns and the  
36 general practitioner. It was also emphasised that the cost and accessibility of screening should be  
37 revised.  
38  
39  
40  
41  
42  
43  
44

## 45 Acknowledgements

46  
47 The authors would like to thank the staff of the general practice where this study was conducted for  
48 their assistance with participant recruitment. We also would like to acknowledge the women who  
49 participated in interviews for their time and opinions.  
50  
51

## 52 Author Statement

53  
54 AN designed the study, conducted interviews, transcribed interviews, coded data, conducted  
55 thematic analysis and was primary author of the manuscript. RB assisted with logistical  
56 considerations for data collection at the general practice. JB assisted with study design, designing  
57  
58  
59  
60

1  
2  
3 the interview template, reviewed thematic analysis and provided intellectual input into the  
4 manuscripts. CH assisted with study design, creating the interview template and provided  
5 intellectual input into the manuscripts.  
6  
7  
8  
9

## 10 Conflicts of Interests

11 None declared  
12  
13

## 14 Data Statement

15 Data are available upon reasonable request  
16  
17  
18

## 19 Funding

20 This work was supported by the College of Medicine and Dentistry, James Cook University (grant  
21 number JCU-QLD-792241)  
22  
23  
24  
25

## 26 Bibliography

- 27 1. AIHW. Cervical screening in Australia 2019. AIHW website.  
28 [https://www.aihw.gov.au/reports/cancer-screening/cervical-screening-in-australia-](https://www.aihw.gov.au/reports/cancer-screening/cervical-screening-in-australia-2019/contents/table-of-contents)  
29 [2019/contents/table-of-contents](https://www.aihw.gov.au/reports/cancer-screening/cervical-screening-in-australia-2019/contents/table-of-contents). Published May 6 2019. Accessed September 12 2019.
- 30 2. MSAC. National Cervical Screening Program Renewal: Executive Summary. Department of  
31 Health website. [http://www.health.gov.au/internet/msac/publishing.nsf/Content/1276-](http://www.health.gov.au/internet/msac/publishing.nsf/Content/1276-public)  
32 [public](http://www.health.gov.au/internet/msac/publishing.nsf/Content/1276-public). Updated 12<sup>th</sup> October 2016. Accessed September 12 2019.
- 33 3. Arbyn M VF, Snijders PJF, Verhoef VM, Suonio E, Dillner J et. al,. Accuracy of human  
34 papillomavirus testing on self-collected versus clinician-collected samples: a meta-analysis.  
35 *Lancet Oncol*. 2014;15(2):172-183. doi: 10.1016/S1470-2045(13)70570-9
- 36 4. WHO. Comprehensive cervical cancer prevention and control - a healthier future for girls  
37 and women. WHO  
38 website.<https://www.who.int/reproductivehealth/publications/cancers/9789241505147/en>  
39 [/](https://www.who.int/reproductivehealth/publications/cancers/9789241505147/en). Published 2013. Accessed November 22 2019.
- 40 5. Maver PJ, Poljak M. Primary HPV-based cervical cancer screening in Europe: implementation  
41 status, challenges, and future plans. *Clin Microbiol Infect*. 2019. doi:  
42 [10.1016/j.cmi.2019.09.006](https://doi.org/10.1016/j.cmi.2019.09.006).
- 43 6. Chrysostomou AC, Stylianou DC, Constantinidou A, Kostrikis LG. Cervical Cancer Screening  
44 Programs in Europe: The Transition Towards HPV Vaccination and Population-Based HPV  
45 Testing. *Viruses*. 2018;10(12). doi: 10.3390/v10120729.
- 46 7. Patel H, Moss EL, Sherman SM. HPV primary cervical screening in England: Women's  
47 awareness and attitudes. *Psychooncology*. 2018;27(6):1559-1564. doi: 10.1002/pon.4694.
- 48 8. McCaffery K, Waller J, Nazroo J, Wardle J. Social and psychological impact of HPV testing in  
49 cervical screening: a qualitative study. *Sex Transm Infect*. 2006;82(2):169-174. doi:  
50 [10.1136/sti.2005.016436](https://doi.org/10.1136/sti.2005.016436).
- 51 9. Daley EM, Perrin KM, McDermott RJ, et al. The psychosocial burden of HPV: a mixed-method  
52 study of knowledge, attitudes and behaviors among HPV+ women. *J Health Psychol*.  
53 *2010;15(2):279-290*. doi: 10.1177/1359105309351249.  
54  
55  
56  
57  
58  
59  
60

10. Dodd RH, Obermair HM, McCaffery KJ. A Thematic Analysis of Attitudes Toward Changes to Cervical Screening in Australia. *JMIR Cancer*. 2019;5(1):e12307. doi: 10.2196/12307.
11. Kwok C, White K, Roydhouse J. Chinese-Australian Women's Knowledge, Facilitators and Barriers Related to Cervical Cancer Screening: A Qualitative Study. *J Immigr Minor Health*. 2011;13(6):1076-1083. doi: 10.1007/s10903-011-9491-4.
12. Anaman-Torgbor JA, King J, Correa-Velez I. Barriers and facilitators of cervical cancer screening practices among African immigrant women living in Brisbane, Australia. *Eur J Oncol Nurs*. 2017;31:22-29. doi: 10.1016/j.ejon.2017.09.005.
13. Hagens V, Dobrow MJ, Chafe R. Interviewee Transcript Review: assessing the impact on qualitative research. *BMC Med Res Methodol*. 2009;9:47. doi: 10.1186/1471-2288-9-47.
14. NVivo for Windows, Version 12 Plus. Melbourne, Vic:QSR International Pty Ltd.
15. Ogilvie GS, Smith LW, van Niekerk DJ, et al. Women's intentions to receive cervical cancer screening with primary human papillomavirus testing. *Int J Cancer*. 2013;133(12):2934-2943. doi: 10.1002/ijc.28324.
16. Obermair HM, Dodd RH, Bonner C, Jansen J, McCaffery K. 'It has saved thousands of lives, so why change it?' Content analysis of objections to cervical screening programme changes in Australia. *BMJ Open*.8(2):e019171.
17. McRae J, Martin C, O'Leary J, Sharp L, Irish Cervical Screening Research C. "If you can't treat HPV, why test for it?" Women's attitudes to the changing face of cervical cancer prevention: a focus group study. *BMC Womens Health*. 2014;14:64. doi: 10.1186/1472-6874-14-64.
18. Elit L. Role of cervical screening in older women. *Maturitas*. 2014;79(4):413-420. doi: 10.1016/j.maturitas.2014.09.012.
19. Cancer Council Australia Cervical Screening Guidelines Working Party. National Cervical Screening Program: Guidelines for the management of screen-detected abnormalities, screening in specific populations and investigation of abnormal vaginal bleeding. Cancer Council Australia: Clinical Guidelines Network website. [https://wiki.cancer.org.au/australia/Guidelines:Cervical\\_cancer/Screening/Medical\\_Services\\_Advisory\\_Committee\\_recommendations\\_for\\_HPV\\_testing](https://wiki.cancer.org.au/australia/Guidelines:Cervical_cancer/Screening/Medical_Services_Advisory_Committee_recommendations_for_HPV_testing). Published 2017. Accessed September 12, 2019.
20. Waller J, McCaffery K, Kitchener H, Nazroo J, Wardle J. Women's experiences of repeated HPV testing in the context of cervical cancer screening: a qualitative study. *Psychooncology*. 2007;16(3):196-204. doi: 10.1002/pon.1053.
21. Cooper Robbins SC, Bernard D, McCaffery K, Brotherton J, Garland S, Skinner SR. "Is cancer contagious?": Australian adolescent girls and their parents: making the most of limited information about HPV and HPV vaccination. *Vaccine*.28(19):3398-3408. doi: 10.1016/j.vaccine.2010.02.078.
22. Zhang J, Le G, Laroche D, et al. Facts or stories? How to use social media for cervical cancer prevention: A multi-method study of the effects of sender type and content type on increased message sharing. *Prev Med*. 2019;126:105751. doi: 10.1016/j.ypmed.2019.105751.
23. Jayasinghe Y, Rangiah C, Gorelik A, et al. Primary HPV DNA based cervical cancer screening at 25 years: Views of young Australian women aged 16-28 years. *J Clin Virol*. 2016;76 Suppl 1:S74-S80. doi: 10.1016/j.jcv.2015.10.026.
24. Pitts MK, Dyson SJ, Rosenthal DA, Garland SM. Knowledge and awareness of human papillomavirus (HPV): attitudes towards HPV vaccination among a representative sample of women in Victoria, Australia. *Sex Health*. 2007;4(3):177-180. <https://www.ncbi.nlm.nih.gov/pubmed/17931530>.
25. Peterson EB, Ostroff JS, DuHamel KN, et al. Impact of provider-patient communication on cancer screening adherence: A systematic review. *Prev Med*. 2016;93:96-105. doi: 10.1016/j.ypmed.2016.09.034.

- 1  
2  
3 26. Spadea T, Bellini S, Kunst A, Stirbu I, Costa G. The impact of interventions to improve  
4 attendance in female cancer screening among lower socioeconomic groups: a review. *Prev*  
5 *Med.* 2010;50(4):159-164. doi: 10.1016/j.ypmed.2010.01.007.  
6  
7 27. Chorley AJ, Marlow LAV, Forster AS, Haddrell JB, Waller J. Experiences of cervical screening  
8 and barriers to participation in the context of an organised programme: a systematic review  
9 and thematic synthesis. *Psycho-Oncology.* 2017;26(2):161-172. doi: 10.1002/pon.4126.  
10  
11  
12  
13  
14  
15

16 Table 1: Demographic Tables

| Participant | Age | Screening Status <sup>1</sup> |
|-------------|-----|-------------------------------|
| P1          | 41  | Well-screened                 |
| P2          | 42  | Under-screened                |
| P3          | 43  | Well-screened                 |
| P4          | 53  | Well-screened                 |
| P5          | 30  | Well-screened                 |
| P6          | 55  | Well-screened                 |
| P7          | 58  | Well-screened                 |
| P8          | 33  | Well-screened                 |
| P9          | 20  | Well-screened                 |
| P10         | 22  | Well-screened                 |
| P11         | 57  | Well-screened                 |
| P12         | 36  | Well-screened                 |
| P13         | 38  | Well-screened                 |
| P14         | 35  | Under-screened                |

17  
18  
19  
20  
21  
22  
23  
24  
25  
26  
27  
28  
29  
30  
31  
32  
33  
34  
35  
36  
37 Notes: <sup>1</sup>Participants were considered well-screened if they had not participated in screening the last  
38 two years. Under-screened participants had not been screened in over two years or had never been  
39 screened.  
40  
41  
42  
43  
44  
45  
46  
47  
48  
49  
50  
51  
52  
53  
54  
55  
56  
57  
58  
59  
60

1  
2  
3  
4  
5  
6  
7  
8  
9  
10  
11  
12  
13  
14  
15  
16  
17  
18  
19  
20  
21  
22  
23  
24  
25  
26  
27  
28  
29  
30  
31  
32  
33  
34  
35  
36  
37  
38  
39  
40  
41  
42  
43  
44  
45  
46  
47  
48  
49  
50  
51  
52  
53  
54  
55  
56  
57  
58  
59  
60

For peer review only

Table 2: Themes and Illustrative Quotes

| Theme                    |                                   |                                                                                                                                                                                                                                                                                                                                                                                                                                                                                                                                          |
|--------------------------|-----------------------------------|------------------------------------------------------------------------------------------------------------------------------------------------------------------------------------------------------------------------------------------------------------------------------------------------------------------------------------------------------------------------------------------------------------------------------------------------------------------------------------------------------------------------------------------|
| <b>Attitudes to NCSP</b> | Fear of missing cancer            | <p data-bbox="613 331 920 400">A woman's body changes quickly</p> <p data-bbox="1025 331 2018 435">So obviously, it's important to try and catch it early and a couple of years can make a huge difference. So, I think it probably would have been better if they left it the way that it was. (P10)</p> <p data-bbox="1025 440 2018 544">But like stretching it out that bit further, it worries me that is something going to happen and by the time they come around to screening again, is it going to be too late for me? (P4)</p> |
|                          | Missing non-HPV cancer            | <p data-bbox="1025 584 2018 687">If we miss that 1%, what's that out of 100? That's still one person. One person out of every hundred we're missing, that's sad. That's someone's mother, someone's daughter. (P12)</p> <p data-bbox="1025 692 2018 759">I would think put some women at risk, that are not exposed to HPV and would get it otherwise. (P2)</p>                                                                                                                                                                          |
|                          | Women will forget                 | <p data-bbox="1025 799 2018 866">And then it will get to that five years and people will still go, 'Well I'll just wait another 6 months.' (P5)</p> <p data-bbox="1025 871 2018 938">I think there will be too many people that get complacent and I think because of it too many people will get sick. (P12)</p>                                                                                                                                                                                                                        |
|                          | Personal Experiences              | <p data-bbox="1025 978 2018 1045">Considering that I've had smears that have been not... a little bit concerning, I'd be concerned about that. (P8)</p> <p data-bbox="1025 1050 2018 1117">A friend of mine got cervical cancer when she was 21... If they didn't catch it early, she'd be dead. (P2)</p>                                                                                                                                                                                                                                |
|                          | Younger women are at greater risk |                                                                                                                                                                                                                                                                                                                                                                                                                                                                                                                                          |
|                          | Earlier sexual activity           | <p data-bbox="1025 1193 2018 1260">A lot of children are starting to have sex at 13,14. At 25, for some kids that's over 10 years that kids are sexually active before they have screening. (P3)</p>                                                                                                                                                                                                                                                                                                                                     |
|                          | Vaccine effectiveness             | <p data-bbox="1025 1300 2018 1367">Depends on how good the vaccination is and the stats around how effective that is. Because we know that vaccinations aren't 100%. (P8)</p>                                                                                                                                                                                                                                                                                                                                                            |

1  
2  
3  
4  
5  
6  
7  
8  
9  
10  
11  
12  
13  
14  
15  
16  
17  
18  
19  
20  
21  
22  
23  
24  
25  
26  
27  
28  
29  
30  
31  
32  
33  
34  
35  
36  
37  
38  
39  
40  
41  
42  
43  
44  
45  
46

Maybe that's what contributed to the 25 age testing that a lot of younger women have had the Gardasil vaccine but even then, a lot of parents won't let their kids have that. (P5)

More young people have cancer And I've heard that there has been cases of younger ones getting cervical cancer. Stuff that normally you don't see til you are older and now coming up in younger women. (P4)  
I think younger people are at higher risk. (P2)

The changes are good

Trust in medicine I think I've got faith in the doctors because there must be a reason as to why they are doing that. (P11)

Reduced discomfort Well I like the idea of not having to go back every 2 years and not be in that uncomfortable position. (P14)

Earlier detection of cancer I guess it starts somewhere doesn't it. If they pick up one thing, they can prevent it from leading to something else. (P13)

#### Screening Beliefs

Personal

To be healthy Just because I want to be healthy, like I go to the dentist and have a normal check up every year. This is part of the routine. (P11)

To be there for family It wouldn't just affect me, it would affect my whole family. I couldn't be selfish like that, to not get it done for whatever reason. Because, once you're gone... you've left and not destroyed but you've upset your whole family by not going to look after yourself when it's just a simple test. (P4)

Hx cancer/abnormal smears My grandma got really sick with cancer and so it kind of has impacted me to make sure I try and look after myself. (P10)  
A long time ago I did have an abnormal smear. So, I guess knowing that, not wanting to go through that again making sure I'm keeping on top of that, so it doesn't happen again. (P13)

|    |                                  |                                                                                        |
|----|----------------------------------|----------------------------------------------------------------------------------------|
| 1  |                                  |                                                                                        |
| 2  |                                  |                                                                                        |
| 3  | Practitioner                     |                                                                                        |
| 4  | Feeling comfortable              | As long as I felt comfortable with the doctor. Their bedside manner was nice, they     |
| 5  |                                  | were clean, the instruments they used was sterile, they followed all their proper      |
| 6  |                                  | PPE precautions. (P12)                                                                 |
| 7  |                                  |                                                                                        |
| 8  |                                  |                                                                                        |
| 9  |                                  |                                                                                        |
| 10 | Trust in regular GP              | I always just go to my GP. (P9)                                                        |
| 11 |                                  | .... because I had been going to him for a long time. (P4)                             |
| 12 |                                  |                                                                                        |
| 13 | Male Practitioner                | I just feel more comfortable with a female because I'm female (P11)                    |
| 14 |                                  |                                                                                        |
| 15 | <b>Potential Interventions</b>   |                                                                                        |
| 16 | Education Programs               | And that the girls should be learning about it at school in their health and wellness  |
| 17 |                                  | classes as well so that as maturing adults they are aware of what is going on in their |
| 18 |                                  | own bodies. (P3)                                                                       |
| 19 |                                  | Kids these days get information from their friends, if their parents don't talk to     |
| 20 |                                  | them about it. So, if you are one of those parents that doesn't, your children are     |
| 21 |                                  | going to take information from their friends that might be incorrect. (P5)             |
| 22 | General Practitioner             | The GP would be good. You listen to them. Even if they give you a piece of paper,      |
| 23 |                                  | you go read that. (P6)                                                                 |
| 24 |                                  | I do think that it would be a good idea that when you are having a pap smear the       |
| 25 |                                  | doctor talks to you about the relationship between cervical cancer and other issues    |
| 26 |                                  | and stuff (P3)                                                                         |
| 27 |                                  |                                                                                        |
| 28 |                                  |                                                                                        |
| 29 | Media Campaign                   | So just put it on my Facebook screen or my Instagram or something like that. So        |
| 30 |                                  | then, y'know that I can click on it and it's private. (P2)                             |
| 31 |                                  | It's something that should be spoken about more, y'know. And I just think              |
| 32 |                                  | advertising on tv would be a strong starting point (P12)                               |
| 33 |                                  | I feel like people need to hear about the stories of people actually having cancer. I  |
| 34 |                                  | think the scare factor is pretty effective for young people. (P8)                      |
| 35 |                                  |                                                                                        |
| 36 |                                  |                                                                                        |
| 37 | Improving cost and accessibility | I think anything to do with those tests (cervical screening) should come with a bulk   |
| 38 |                                  | billing visit for women because it is a deterrent for going to your GP. (P5)           |
| 39 |                                  |                                                                                        |
| 40 |                                  |                                                                                        |
| 41 |                                  |                                                                                        |
| 42 |                                  |                                                                                        |
| 43 |                                  |                                                                                        |
| 44 |                                  |                                                                                        |
| 45 |                                  |                                                                                        |
| 46 |                                  |                                                                                        |



1  
2  
3  
4  
5  
6  
7  
8  
9  
10  
11  
12  
13  
14  
15  
16  
17  
18  
19  
20  
21  
22  
23  
24  
25  
26  
27  
28  
29  
30  
31  
32  
33  
34  
35  
36  
37  
38  
39  
40  
41  
42  
43  
44  
45  
46

And if you did like pop up clinics because you know they always have pop up Red Cross Blood Van (P9)

For peer review only

## Figures

Figure 1: Relationship between identified themes

## Appendix

Appendix 1: Piloted semi-structured interview guide

For peer review only

1  
2  
3  
4  
5  
6  
7  
8  
9  
10  
11  
12  
13  
14  
15  
16  
17  
18  
19  
20  
21  
22  
23  
24  
25  
26  
27  
28  
29  
30  
31  
32  
33  
34  
35  
36  
37  
38  
39  
40  
41  
42  
43  
44  
45  
46

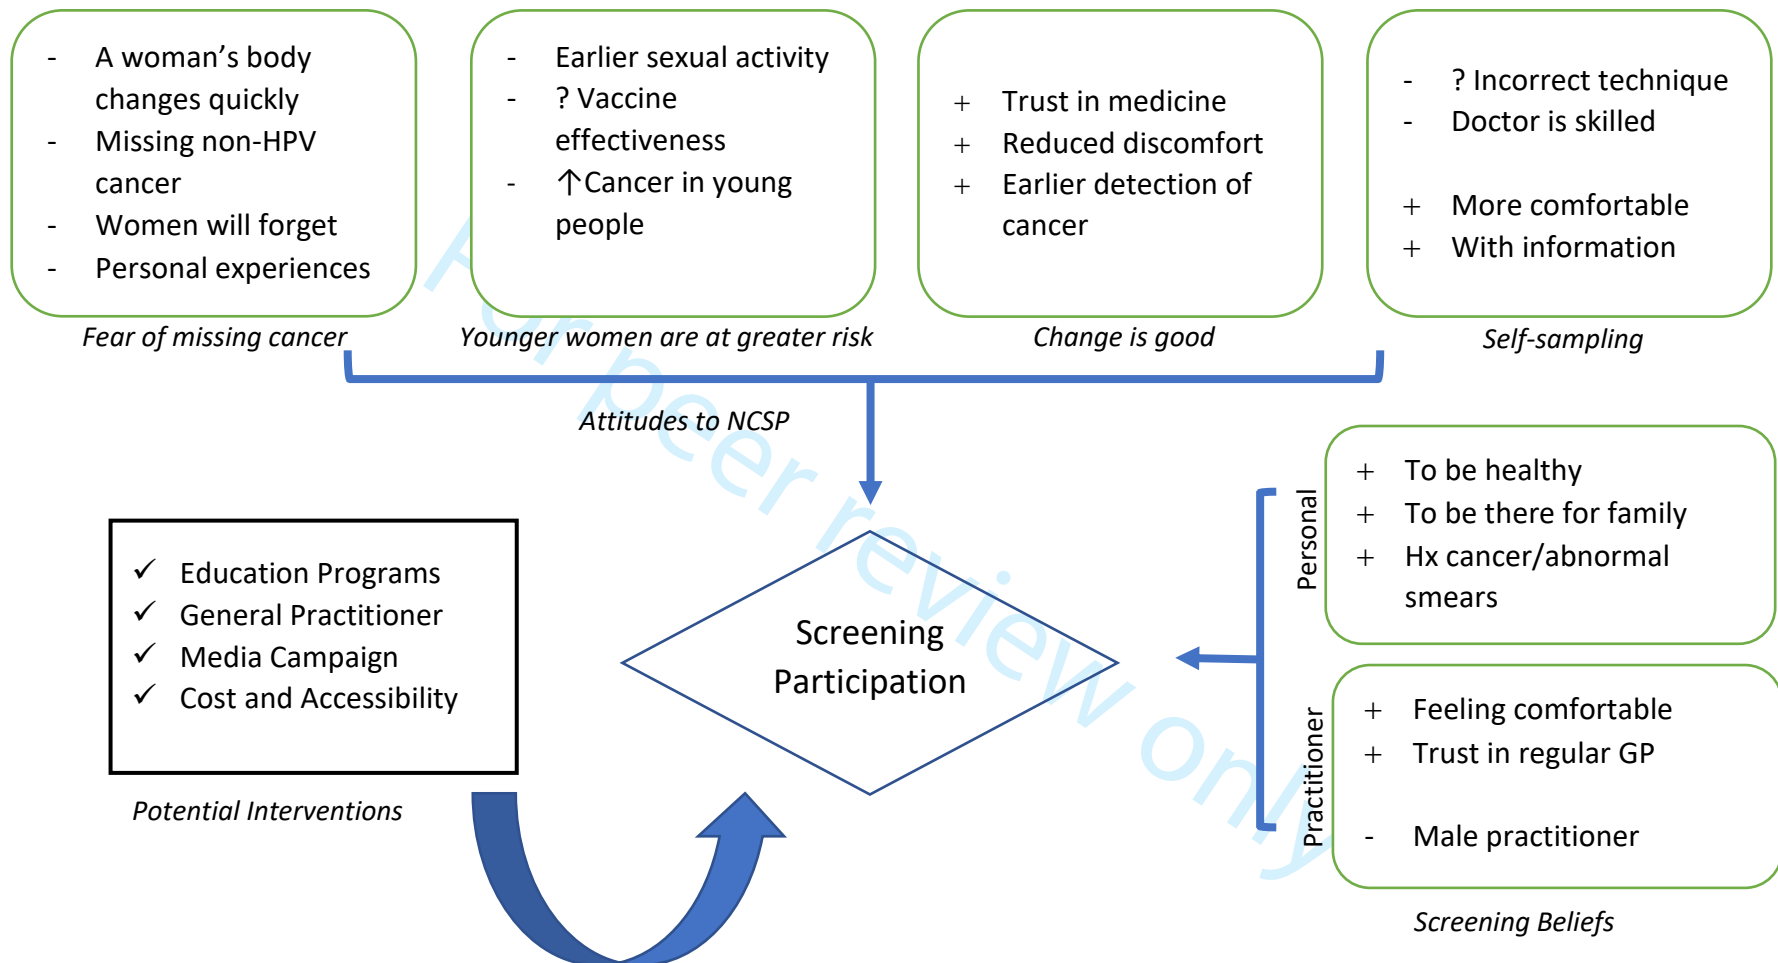

# Interview Template- Women's perceptions and understanding of cervical cancer and its screening

1. What do you know about cervical cancer?
  - a. What do you think causes cervical cancer?
  - b. What do you think are the symptoms of cervical cancer?
  - c. What do you believe makes you more at risk for cervical cancer?
  - d. How do you think HPV (wart virus) is related to cervical cancer?
2. What do you know about cervical cancer screening?
3. Cervical cancer screening has changed from every 2 years to every 5 years as of December 2017. How do you feel about that?
  - a. How do you feel about starting screening at 25 years old instead of 18 years old?
  - b. Do you feel about screening every 5 years instead of 2 years?
  - c. As part of the new cervical cancer guidelines, some women will be allowed to take their own sample. How comfortable do you feel about the possibility that you can take your own sample?
  - d. How do you feel about new screening tests looking for HPV (wart virus) first rather than looking at abnormal cells?
4. I am going to provide you some information about the new cervical screening program

*Cervical cancer is caused by Human papilloma virus (HPV), which high school students are now being vaccinated for. This virus also causes genital warts, anal cancer and throat cancer. HPV is contracted through sex and very common amongst those who are sexually active. Those who are infected with HPV may have some abnormal changes, but they often clear the infection themselves over a year or two. It takes about 10 years for abnormalities caused by this virus to cause cancer, this is quite rare.*

*Although it will feel the same for you, the way your sample is stored and tested is different. It looks for HPV virus first and only if this is present will you have your smear looked at under a microscope. It is expected that the changes to the National Cervical Screening Program will protect up to 30% more women from cervical cancer. The new Cervical Screening Test is a more accurate, effective and safe test to have every five years instead of the two yearly Pap test.*

Source:

1  
2  
3 [http://www.cancerscreening.gov.au/internet/screening/publishing.nsf/Content/D0EA98D07](http://www.cancerscreening.gov.au/internet/screening/publishing.nsf/Content/D0EA98D0745313FACA2581D3001A6950/$File/DL-Brochure-Larger-Print-version.pdf)  
4 [45313FACA2581D3001A6950/\\$File/DL-Brochure-Larger-Print-version.pdf](http://www.cancerscreening.gov.au/internet/screening/publishing.nsf/Content/D0EA98D0745313FACA2581D3001A6950/$File/DL-Brochure-Larger-Print-version.pdf)  
5

- 6 a. Does this change your opinion about the changes to cervical screening?  
7 b. Do you feel comfortable with testing for HPV first?  
8 c. Do you feel it is safe to be tested every five years and to start testing later?  
9
- 10 5. How comfortable do you feel with getting a pap smear/cervical cancer screen?  
11 a. Why do you choose or choose not to participate in cervical cancer screening?  
12 b. Do you have any personal factors that impact your decision?  
13 c. Does the doctor performing the test impact your decision?  
14
- 15 6. How would you feel if your GP told you that you had 'wart virus'?  
16 a. Would you prefer if your doctor called it HPV or wart virus and why?  
17
- 18 7. What would you like to know about cervical cancer? How would you like to find out about  
19 this?  
20
- 21 8. What would you like to know about cervical screening? How would you like to find out about  
22 this?  
23
- 24 9. How do you think participation in cervical cancer screening could be improved?  
25  
26  
27  
28  
29
- 30 10. Do you have any questions, concerns or a final statement?  
31  
32  
33  
34  
35  
36  
37  
38  
39  
40  
41  
42  
43  
44  
45  
46  
47  
48  
49  
50  
51  
52  
53  
54  
55  
56  
57  
58  
59  
60

## COREQ (CONsolidated criteria for REporting Qualitative research) Checklist

A checklist of items that should be included in reports of qualitative research. You must report the page number in your manuscript where you consider each of the items listed in this checklist. If you have not included this information, either revise your manuscript accordingly before submitting or note N/A.

| Topic                                          | Item No. | Guide Questions/Description                                                                                                                              | Reported on Page No. |
|------------------------------------------------|----------|----------------------------------------------------------------------------------------------------------------------------------------------------------|----------------------|
| <b>Domain 1: Research team and reflexivity</b> |          |                                                                                                                                                          |                      |
| <i>Personal characteristics</i>                |          |                                                                                                                                                          |                      |
| Interviewer/facilitator                        | 1        | Which author/s conducted the interview or focus group?                                                                                                   |                      |
| Credentials                                    | 2        | What were the researcher's credentials? E.g. PhD, MD                                                                                                     |                      |
| Occupation                                     | 3        | What was their occupation at the time of the study?                                                                                                      |                      |
| Gender                                         | 4        | Was the researcher male or female?                                                                                                                       |                      |
| Experience and training                        | 5        | What experience or training did the researcher have?                                                                                                     |                      |
| <i>Relationship with participants</i>          |          |                                                                                                                                                          |                      |
| Relationship established                       | 6        | Was a relationship established prior to study commencement?                                                                                              |                      |
| Participant knowledge of the interviewer       | 7        | What did the participants know about the researcher? e.g. personal goals, reasons for doing the research                                                 |                      |
| Interviewer characteristics                    | 8        | What characteristics were reported about the interviewer/facilitator? e.g. Bias, assumptions, reasons and interests in the research topic                |                      |
| <b>Domain 2: Study design</b>                  |          |                                                                                                                                                          |                      |
| <i>Theoretical framework</i>                   |          |                                                                                                                                                          |                      |
| Methodological orientation and Theory          | 9        | What methodological orientation was stated to underpin the study? e.g. grounded theory, discourse analysis, ethnography, phenomenology, content analysis |                      |
| <i>Participant selection</i>                   |          |                                                                                                                                                          |                      |
| Sampling                                       | 10       | How were participants selected? e.g. purposive, convenience, consecutive, snowball                                                                       |                      |
| Method of approach                             | 11       | How were participants approached? e.g. face-to-face, telephone, mail, email                                                                              |                      |
| Sample size                                    | 12       | How many participants were in the study?                                                                                                                 |                      |
| Non-participation                              | 13       | How many people refused to participate or dropped out? Reasons?                                                                                          |                      |
| <i>Setting</i>                                 |          |                                                                                                                                                          |                      |
| Setting of data collection                     | 14       | Where was the data collected? e.g. home, clinic, workplace                                                                                               |                      |
| Presence of non-participants                   | 15       | Was anyone else present besides the participants and researchers?                                                                                        |                      |
| Description of sample                          | 16       | What are the important characteristics of the sample? e.g. demographic data, date                                                                        |                      |
| <i>Data collection</i>                         |          |                                                                                                                                                          |                      |
| Interview guide                                | 17       | Were questions, prompts, guides provided by the authors? Was it pilot tested?                                                                            |                      |
| Repeat interviews                              | 18       | Were repeat interviews carried out? If yes, how many?                                                                                                    |                      |
| Audio/visual recording                         | 19       | Did the research use audio or visual recording to collect the data?                                                                                      |                      |
| Field notes                                    | 20       | Were field notes made during and/or after the interview or focus group?                                                                                  |                      |
| Duration                                       | 21       | What was the duration of the interviews or focus group?                                                                                                  |                      |
| Data saturation                                | 22       | Was data saturation discussed?                                                                                                                           |                      |
| Transcripts returned                           | 23       | Were transcripts returned to participants for comment and/or                                                                                             |                      |

| Topic                                  | Item No. | Guide Questions/Description                                                                                                        | Reported on Page No. |
|----------------------------------------|----------|------------------------------------------------------------------------------------------------------------------------------------|----------------------|
|                                        |          | correction?                                                                                                                        |                      |
| <b>Domain 3: analysis and findings</b> |          |                                                                                                                                    |                      |
| <i>Data analysis</i>                   |          |                                                                                                                                    |                      |
| Number of data coders                  | 24       | How many data coders coded the data?                                                                                               |                      |
| Description of the coding tree         | 25       | Did authors provide a description of the coding tree?                                                                              |                      |
| Derivation of themes                   | 26       | Were themes identified in advance or derived from the data?                                                                        |                      |
| Software                               | 27       | What software, if applicable, was used to manage the data?                                                                         |                      |
| Participant checking                   | 28       | Did participants provide feedback on the findings?                                                                                 |                      |
| <i>Reporting</i>                       |          |                                                                                                                                    |                      |
| Quotations presented                   | 29       | Were participant quotations presented to illustrate the themes/findings?<br>Was each quotation identified? e.g. participant number |                      |
| Data and findings consistent           | 30       | Was there consistency between the data presented and the findings?                                                                 |                      |
| Clarity of major themes                | 31       | Were major themes clearly presented in the findings?                                                                               |                      |
| Clarity of minor themes                | 32       | Is there a description of diverse cases or discussion of minor themes?                                                             |                      |

Developed from: Tong A, Sainsbury P, Craig J. Consolidated criteria for reporting qualitative research (COREQ): a 32-item checklist for interviews and focus groups. *International Journal for Quality in Health Care*. 2007. Volume 19, Number 6: pp. 349 – 357

**Once you have completed this checklist, please save a copy and upload it as part of your submission. DO NOT include this checklist as part of the main manuscript document. It must be uploaded as a separate file.**
